# Supplementary material for: Clinical Burden of Angiographic Vasospasm and Its Complications After Aneurysmal Subarachnoid Hemorrhage: A Systematic Review
Source: PubMed Central journal article supplement — Neurol Ther. 2023 Jan 7;12(2):371–90. doi: 10.1007/s40120-022-00436-7 (PMC10043150; doi:10.1007/s40120-022-00436-7), 2023-01-07
Supplement: 40120_2022_436_MOESM1_ESM.pdf [file 40120_2022_436_MOESM1_ESM.pdf]

# **Clinical Burden of Angiographic Vasospasm and Its Complications after Aneurysmal Subarachnoid Hemorrhage: a Systematic Review**

## **Authors**

François-Xavier Chalet · Orestis Briasoulis · Eric J. Manalastas · Darren A. Talbot · Juliette C. Thompson · R Loch Macdonald

## **Author affiliations**

F-X Chalet · O. Briasoulis · D. A. Talbot

Idorsia Pharmaceuticals Ltd, Hegenheimermattweg 91, 4123 Allschwil, Switzerland

E. J. Manalastas · J. C. Thompson

Visible Analytics, Oxford, UK

R. Loch Macdonald

Community Health Partners, Community Neurosciences Institute, Fresno, CA 93701, USA

**Corresponding author:** François-Xavier Chalet [francois-xavier.chalet@idorsia.com](mailto:francois-xavier.chalet@idorsia.com)

## Supplementary Material

**Table S1.** Embase and Medline search strategy (searched via Embase.com)

| No. | Query                                                                                                                                                                                                                                                                            |
|-----|----------------------------------------------------------------------------------------------------------------------------------------------------------------------------------------------------------------------------------------------------------------------------------|
| #1  | 'subarach-id hemorrhage'/exp                                                                                                                                                                                                                                                     |
| #2  | (subarach-id NEXT/2 (hemorrhage OR haemorrhage)):ti,ab                                                                                                                                                                                                                           |
| #3  | 'intracranial aneurysm'/exp                                                                                                                                                                                                                                                      |
| #4  | 'intracranial aneurysm':ti,ab OR 'aneurysm':ti,ab OR 'aneurysmal':ti,ab OR 'brain infarction':ti,ab OR 'brain ischemia':ti,ab OR 'cerebral infarction':ti,ab OR 'cerebral ischemia':ti,ab                                                                                        |
| #5  | (#1 OR #2) AND (#3 OR #4)                                                                                                                                                                                                                                                        |
| #6  | 'aneurysmal subarach-id hemorrhage':ti,ab OR 'aneurysmal subarach-id haemorrhage':ti,ab                                                                                                                                                                                          |
| #7  | #5 OR #6                                                                                                                                                                                                                                                                         |
| #8  | 'vasospasm':ti,ab OR 'brain vasospasm':ti,ab                                                                                                                                                                                                                                     |
| #9  | #7 OR #8                                                                                                                                                                                                                                                                         |
| #10 | 'glasgow outcome scale':ti,ab OR 'glasgow coma score':ti,ab                                                                                                                                                                                                                      |
| #11 | 'national institutes of health stroke scale':ti,ab OR 'nihss':ti,ab                                                                                                                                                                                                              |
| #12 | 'rankin scale':ti,ab                                                                                                                                                                                                                                                             |
| #13 | 'functional status examination'                                                                                                                                                                                                                                                  |
| #14 | 'functional status assessment'                                                                                                                                                                                                                                                   |
| #15 | 'disability rating scale' OR 'drs'                                                                                                                                                                                                                                               |
| #16 | 'functional independence measure' OR 'fim'                                                                                                                                                                                                                                       |
| #17 | 'mini mental state examination' OR 'mmse'                                                                                                                                                                                                                                        |
| #18 | 'montreal cognitive assessment'                                                                                                                                                                                                                                                  |
| #19 | 'delayed cerebral ischemia' OR dci                                                                                                                                                                                                                                               |
| #20 | 'brain infarction':ti,ab OR 'cerebral infarction':ti,ab                                                                                                                                                                                                                          |
| #21 | 'delayed ischemic neurological deficit'                                                                                                                                                                                                                                          |
| #22 | 'mortality'                                                                                                                                                                                                                                                                      |
| #23 | #10 OR #11 OR #12 OR #13 OR #14 OR #15 OR #16 OR #17 OR #18 OR #19 OR #20 OR #21 OR #22                                                                                                                                                                                          |
| #24 | #9 AND #23                                                                                                                                                                                                                                                                       |
| #25 | #24 -T ('animal'/de -T 'human'/de)                                                                                                                                                                                                                                               |
| #26 | #25 -T ([conference abstract]/lim OR [conference paper]/lim OR [conference review]/lim OR [editorial]/lim OR [erratum]/lim OR [letter]/lim OR [-te]/lim)                                                                                                                         |
| #27 | #26 -T 'case report'                                                                                                                                                                                                                                                             |
| #28 | #27 -T (review:it -T ((systematic:ti,ab OR meta:ti,ab) AND analy*:ti,ab OR ((indirect:ti,ab OR mixed:ti,ab) AND 'treatment comparison':ti,ab)))                                                                                                                                  |
| #29 | 'randomised controlled trial':de OR 'controlled clinical trial':de OR 'pragmatic trial':de OR 'equivalence trial':de OR 'phase 3 clinical trial':de OR 'randomization':de OR 'double blind procedure':de OR 'single blind procedure':de OR 'placebo':de OR 'controlled study':de |

| No. | Query                                                                                                         |
|-----|---------------------------------------------------------------------------------------------------------------|
| #30 | random*:ti,ab OR sham:ti,ab OR placebo*:ti,ab                                                                 |
| #31 | ((singl* OR doubl* OR tripl* OR trebl*) NEXT/1 (blind* OR dumm* OR mask*)):ti,ab                              |
| #32 | (control* NEAR/3 (study OR studies OR trial* OR group*)):ti,ab                                                |
| #33 | -nrandom*:ti,ab OR '-n random*':ti,ab OR '-n-random*':ti,ab OR 'quasi-random*':ti,ab OR quasirandom*:ti,ab    |
| #34 | allocated:ti,ab                                                                                               |
| #35 | ('open label' NEAR/5 (study OR studies OR trial*)):ti,ab                                                      |
| #36 | ((equivalence OR superiority OR '-n-inferiority' OR -ninferiority) NEAR/3 (study OR studies OR trial*)):ti,ab |
| #37 | 'pragmatic stud*':ti,ab                                                                                       |
| #38 | ((pragmatic OR practical) NEAR/3 trial*):ti,ab                                                                |
| #39 | ((quasiexperimental OR 'quasi-experimental') NEAR/3 (study OR studies OR trial*)):ti,ab                       |
| #40 | (phase NEAR/3 (iii OR '3') NEAR/3 (study OR studies OR trial*)):ti,ab                                         |
| #41 | #29 OR #30 OR #31 OR #32 OR #33 OR #34 OR #35 OR #36 OR #37 OR #38 OR #39 OR #40                              |
| #42 | 'clinical study'/exp                                                                                          |
| #43 | 'case control study'/exp                                                                                      |
| #44 | 'family study'/exp                                                                                            |
| #45 | 'longitudinal study'/exp                                                                                      |
| #46 | 'retrospective study'/exp                                                                                     |
| #47 | 'prospective study'/exp                                                                                       |
| #48 | 'randomized controlled trial'/exp                                                                             |
| #49 | #47 -T #48                                                                                                    |
| #50 | 'cohort analysis'/exp                                                                                         |
| #51 | (cohort NEXT/1 (study OR studies)):ti,ab                                                                      |
| #52 | ('case control' NEXT/1 (study OR studies)):ti,ab                                                              |
| #53 | ('follow up' NEXT/1 (study OR studies)):ti,ab                                                                 |
| #54 | (observational NEXT/1 (study OR studies)):ti,ab                                                               |
| #55 | (epidemiologic* NEXT/1 (study OR studies)):ti,ab                                                              |
| #56 | ('cross sectional' NEXT/1 (study OR studies)):ti,ab                                                           |
| #57 | #42 OR #43 OR #44 OR #45 OR #46 OR #49 OR #50 OR #51 OR #52 OR #53 OR #54 OR #55 OR #56                       |
| #58 | 'register'/exp                                                                                                |
| #59 | 'register':ti,ab OR 'registry':ti,ab                                                                          |
| #60 | 'real world evidence'/exp OR 'real world data'/exp                                                            |
| #61 | 'real world':ti,ab                                                                                            |
| #62 | #57 OR #58 OR #59 OR #60 OR #61                                                                               |
| #63 | #41 OR #62                                                                                                    |

| No. | Query       |
|-----|-------------|
| #64 | #28 AND #63 |

**Table S2.** Cochrane search strategy

| ID  | Search                                                                                                                                                  |
|-----|---------------------------------------------------------------------------------------------------------------------------------------------------------|
| #1  | MeSH descriptor: [Subarachnoid Hemorrhage] explode all trees                                                                                            |
| #2  | (subarachnoid NEXT/2 (hemorrhage OR haemorrhage)):ti,ab                                                                                                 |
| #3  | MeSH descriptor: [Intracranial Aneurysm] explode all trees                                                                                              |
| #4  | ('intracranial aneurysm' OR 'aneurysm' OR 'aneurysmal' OR 'brain infarction' OR 'brain ischemia' OR 'cerebral infarction' OR 'cerebral ischemia'):ti,ab |
| #5  | (#1 OR #2) AND (#3 OR #4)                                                                                                                               |
| #6  | ('aneurysmal subarachnoid hemorrhage' OR 'aneurysmal subarachnoid haemorrhage'):ti,ab                                                                   |
| #7  | #5 OR #6                                                                                                                                                |
| #8  | ('vasospasm' OR 'brain vasospasm'):ti,ab                                                                                                                |
| #9  | #7 OR #8                                                                                                                                                |
| #10 | (conference OR 'conference paper'):pt                                                                                                                   |
| #11 | review:pt                                                                                                                                               |
| #12 | ((systematic OR meta) AND analy* OR ((indirect OR mixed) AND 'treatment comparison')):ti,ab                                                             |
| #13 | #11 NOT #12                                                                                                                                             |
| #14 | #9 NOT (#10 OR #13)                                                                                                                                     |

**Table S3.** Summary of data extraction variables

|                                |                                                                                                                                                                                                                                                                                                                                                                                                                                                                                                                                                                                                                                                                                                                                                                                                                                   |                                                                                                                |
|--------------------------------|-----------------------------------------------------------------------------------------------------------------------------------------------------------------------------------------------------------------------------------------------------------------------------------------------------------------------------------------------------------------------------------------------------------------------------------------------------------------------------------------------------------------------------------------------------------------------------------------------------------------------------------------------------------------------------------------------------------------------------------------------------------------------------------------------------------------------------------|----------------------------------------------------------------------------------------------------------------|
| <b>Study objective</b>         | As stated in the publication                                                                                                                                                                                                                                                                                                                                                                                                                                                                                                                                                                                                                                                                                                                                                                                                      |                                                                                                                |
| <b>Study characteristics</b>   | Author, year<br>Design (e.g. randomized, observational, survey)<br>Randomization & blinding methods (if RCTs)<br>Selection criteria and study design for non-RCTs<br>Baseline stratification<br>Years of study conduct                                                                                                                                                                                                                                                                                                                                                                                                                                                                                                                                                                                                            | Follow up duration<br>Country<br>Key inclusion/exclusion criteria<br>Study phase<br>Sample size                |
| <b>Patient characteristics</b> | Age<br>Sex<br>Race/ethnicity<br>Body weight, BMI<br>Comorbidities                                                                                                                                                                                                                                                                                                                                                                                                                                                                                                                                                                                                                                                                                                                                                                 | Morbidity score on admission<br>Days between admission and treatment<br>Treatment modality (coiling, clipping) |
| <b>Medication</b>              | Drugs (such as prophylactic “triple-H” therapy, clazosentan, and intraarterial papaverine calcium channel blockers, milrinone, tirilazad, fasudil, cilostazol, albumin, eicosapentaenoic acid, erythropoietin, corticosteroids, minocycline, deferoxamine, intrathecal thrombolytics)                                                                                                                                                                                                                                                                                                                                                                                                                                                                                                                                             |                                                                                                                |
| <b>Study outcomes</b>          | Measure of clinical events <ul style="list-style-type: none"> <li>•Delayed Cerebral Ischemia (DCI)</li> <li>•Cerebral Infarction</li> <li>•Delayed Ischemic Neurological Deficits (DIND)</li> </ul> Measure of cognitive status <ul style="list-style-type: none"> <li>•Mini-Mental State Exam (MMSE)</li> <li>•Montreal Cognitive Assessment (MoCA)</li> </ul> Measure of functional status <ul style="list-style-type: none"> <li>•Glasgow Outcome Scale (GOS)</li> <li>•Glasgow Outcome Scale Extended (GOSE)</li> <li>•Abbreviated National Institutes of Health Stroke Scale (NIHSS)</li> <li>•modified Glasgow Coma Score (mGCS)</li> <li>•modified Rankin Scale</li> <li>•Functional Status Examination (FSE)</li> <li>•Disability Rating Scale (DRS)</li> <li>•Functional Independence Measure (FIM)</li> </ul> Mortality |                                                                                                                |

**Table S4.** Study characteristics of the 59 studies included in the clinical burden systematic literature review

| Author (date)<br>Study ID         | Country         | Data Source                                                                                               | No. of centers | Study design | No. pts | Data collection |          | Consecutive recruitment |
|-----------------------------------|-----------------|-----------------------------------------------------------------------------------------------------------|----------------|--------------|---------|-----------------|----------|-------------------------|
|                                   |                 |                                                                                                           |                |              |         | Start           | End      |                         |
| <b>Comparative studies</b>        |                 |                                                                                                           |                |              |         |                 |          |                         |
| Abulhasan et al. (2020) [21]      | Canada          | Montreal Neurological Institute and Hospital                                                              | 1              | RLC          | 322     | 01-Apr-10       | Mar-2016 | Yes                     |
| Appel et al. (2018) [22]          | Germany         | Department of Intensive Care Medicine, University Medical Center Hamburg-Eppendorf                        | 1              | PLC          | 34      | 2012            | 2014     | Unclear                 |
| Athiraman et al. (2020) [23]      | USA             | Washington University School of Medicine                                                                  | 1              | RLC          | 181     | Jan-10          | Dec-13   | Yes                     |
| Brown et al. (2013) [24]          | USA             | Neurology/Neurosurgery Intensive Care Unit, Barnes-Jewish Hospital                                        | 1              | RLC          | 134     | Jul-07          | Jun-11   | Yes                     |
| Budohoski et al. (2012) [25]      | Poland          | Brodno Mazovia Hospital                                                                                   | 1              | PLC          | 98      | Jun-10          | Jan-12   | Yes                     |
| Ding et al. (2020) [26]           | China           | First Affiliated Hospital of Fujian Medical University                                                    | 1              | PLC          | 103     | Mar-17          | Dec-17   | Yes                     |
| Ehlert et al. (2016) [27]         | Germany         | University Hospital Münster                                                                               | 1              | RCC          | 74      | -               | -        | Yes                     |
| Filipce and Caparoski (2015) [28] | North Macedonia | University Department of Neurosurgery Skopje                                                              | 1              | RLC          | 224     | 2011            | 2015     | Unclear                 |
| Haegens et al. (2018) [29]        | Netherlands     | Academic Medical Center Amsterdam, University Medical Center Groningen, University Medical Center Utrecht | 3              | RLC          | 1,647   | 2006            | 2015     | Unclear                 |

| Author (date)<br>Study ID        | Country     | Data Source                                                               | No. of<br>centers | Study design   | No. pts | Data collection |           | Consecutive<br>recruitment |
|----------------------------------|-------------|---------------------------------------------------------------------------|-------------------|----------------|---------|-----------------|-----------|----------------------------|
|                                  |             |                                                                           |                   |                |         | Start           | End       |                            |
| Hurth et al. (2020) [30]         | Germany     | University Hospital Tuebingen                                             | 1                 | RLC            | 138     | 2010            | 2015      | Yes                        |
| Jeon et al. (2012) [31]          | South Korea | Seoul National University Hospital                                        | 1                 | RLC            | 93      | Jul-07          | Jun-10    | Yes                        |
| Karamchandani et al. (2014) [32] | USA         | University of Michigan                                                    | 1                 | RLC            | 259     | Jan-05          | Feb-12    | Unclear                    |
| Konczalla et al. (2016) [33]     | Germany     | Goethe-University Hospital                                                | 1                 | RLC            | 106     | 2003            | 2012      | Unclear                    |
| Lee et al. (2019) [34]           | Canada      | Ottawa Hospital                                                           | 1                 | RLC            | 463     | Jun-02          | 2011      | Yes                        |
| Mortimer et al. (2015) [35]      | Australia   | Royal North Shore Hospital                                                | 1                 | RCT (post hoc) | 80      | 01-Apr-05       | 01-Feb-10 | -                          |
| Sakr et al. (2016) [36]          | Germany     | Friedrich-Schiller university hospital surgical intensive care unit (ICU) | 1                 | RCC            | 142     | Mar-04          | Nov-10    | Yes                        |
| Sanelli et al. (2012) [37]       | USA         | Weill Cornell Medical College/NewYork-Presbyterian Hospital               | 1                 | RLC            | 137     | Jan-02          | May-09    | Yes                        |
| Tekle et al. (2014) [38]         | USA         | Academic institutions                                                     | 2                 | RCC            | 41      | Jun-06          | Apr-10    | Yes                        |
| Uozumi et al. (2017) [39]        | Japan       | Steel Memorial Hirohata Hospital & Hyogo Brain and Heart Center           | 2                 | RLC            | 97      | Apr-07          | Jun-16    | Unclear                    |
| Vrsajkov et al. (2016) [40]      | Serbia      | Clinical centre of Vojvodina                                              | 1                 | PLC            | 54      | Mar-11          | Jan-13    | Unclear                    |
| <b>Regression-based studies</b>  |             |                                                                           |                   |                |         |                 |           |                            |



| Author (date)<br>Study ID                | Country  | Data Source                                                            | No. of centers | Study design   | No. pts | Data collection |           | Consecutive recruitment |
|------------------------------------------|----------|------------------------------------------------------------------------|----------------|----------------|---------|-----------------|-----------|-------------------------|
|                                          |          |                                                                        |                |                |         | Start           | End       |                         |
| Aldakkan et al. (2017) [41]              | Multiple | Subarachnoid Hemorrhage International Trialists data repository        | Multiple       | RCT (post hoc) | 4,125   | -               | -         | -                       |
| Ali et al. (2018) [42]                   | Turkey   | Istanbul Medical Faculty, Istanbul                                     | 1              | PLC            | 82      | Jan-13          | Jun-15    | Yes                     |
| AlMatter et al. (2018) [43]              | Germany  | Klinikum Stuttgart                                                     | 1              | RLC            | 693     | 01-Jan-07       | 31-Dec-16 | Yes                     |
| Al-Mufti et al. (2017) [44]              | USA      | Neurological Intensive Care Unit of Columbia University Medical Center | 1              | PLC            | 1,286   | Aug-96          | Jun-13    | Yes                     |
| Ayling et al. (2016) [45]<br>CONSCIOUS-1 | Multiple | CONSCIOUS-1                                                            | 52             | RCT (post hoc) | 413     | 2005            | 2006      | -                       |
| Barges-Coll et al. (2013) [46]           | Mexico   | National Institute of Neurology and Neurosurgery                       | 1              | PLC            | 40      | -               | -         | Yes                     |
| Beadell et al. (2012) [47]               | USA      | Oregon Health & Science University                                     | 1              | RLC            | 28      | Jan-05          | Dec-10    | Unclear                 |
| Brawanski et al. (2017) [49]             | Germany  | Goethe-University Hospital                                             | 1              | RLC            | 191     | Jun-99          | Jun-14    | Unclear                 |
| Brawanski et al. (2019) [48]             | Germany  | Goethe-University Hospital                                             | 1              | RLC            | 471     | 1999            | Jun-14    | Yes                     |
| Chotai et al. (2021) [50]                | USA      | NIS database                                                           | 1              | RCC            | 5,353   | Jan-12          | Sep-15    | Yes                     |
| Chou et al. (2010) [51]                  | USA      | Duke University Medical Center database                                | 1              | RCC            | 189     | Feb-99          | Oct-04    | Yes                     |
| Cinotti et al. (2019) [52]               | France   | Centre Hospitalier Universitaire de Nantes                             | 1              | PLC            | 208     | Mar-10          | Dec-12    | Yes                     |

| Author (date)<br>Study ID                        | Country  | Data Source                                             | No. of centers | Study design   | No. pts | Data collection |        | Consecutive recruitment |
|--------------------------------------------------|----------|---------------------------------------------------------|----------------|----------------|---------|-----------------|--------|-------------------------|
|                                                  |          |                                                         |                |                |         | Start           | End    |                         |
| Darkwah Oppong et al. (2018) [53]                | Germany  | University Hospital, University of Duisburg-Essen       | 1              | RLC            | 994     | Jan-03          | Jun-16 | Yes                     |
| Dinc et al. (2019) [54]                          | Germany  | Goethe University Hospital                              | 1              | RLC            | 74      | Jan-16          | Dec-16 | Unclear                 |
| Drazin et al. (2015) [55]                        | USA      | Cedars Sinai Medical Center                             | 1              | RCC            | 107     | -               | -      | Yes                     |
| Dumont et al. (2010) [56]<br>CONSCIOUS-1         | Multiple | CONSCIOUS-1                                             | 52             | RCT (post hoc) | 413     | 2005            | 2006   | -                       |
| Fontana et al. (2018) [57]                       | Belgium  | Erasme Hospital, Université Libre de Bruxelles          | 1              | RLC            | 270     | Jan-11          | May-16 | Yes                     |
| Geraghty et al. (2020) [58]                      | USA      | University of Illinois Hospital                         | 1              | RLC            | 105     | Jan-13          | Jul-19 | Yes                     |
| Hosmann et al. (2018) [59]                       | Austria  | Medical University of Vienna                            | 1              | RLC            | 80      | 1997            | 2017   | Yes                     |
| Ibrahim et al. (2012) [61]<br>CONSCIOUS-1        | Multiple | CONSCIOUS-1                                             | 52             | RCT (post hoc) | 413     | 2005            | 2006   | -                       |
| Ibrahim and Macdonald (2013) [60]<br>CONSCIOUS-1 | Multiple | CONSCIOUS-1                                             | 52             | RCT (post hoc) | 413     | 2005            | 2006   | -                       |
| Ido et al. (2020) [62]                           | Japan    | J-ASPECT Study Diagnosis Procedure Combination database | 579            | RLC            | 17,343  | Apr-10          | Mar-14 | Yes                     |
| Jabbarli et al. (2016) [63]                      | Germany  | University Medical Center Freiburg                      | 1              | RLC            | 531     | Jan-05          | Dec-12 | Yes                     |

| Author (date)<br>Study ID                   | Country                                                                                | Data Source                                                            | No. of centers | Study design   | No. pts | Data collection |        | Consecutive recruitment |
|---------------------------------------------|----------------------------------------------------------------------------------------|------------------------------------------------------------------------|----------------|----------------|---------|-----------------|--------|-------------------------|
|                                             |                                                                                        |                                                                        |                |                |         | Start           | End    |                         |
| Kilbourn et al. (2013) [64]                 | USA                                                                                    | Hartford Hospital Stroke Center                                        | 1              | RLC            | 299     | Jan-06          | Jun-11 | Unclear                 |
| Konczalla et al. (2016) [65]                | Germany                                                                                | Goethe-University Hospital                                             | 1              | RLC            | 193     | 1999            | 2013   | Unclear                 |
| Lannes et al. (2012) [66]                   | Canada                                                                                 | Montreal Neurological Hospital                                         | 1              | RLC            | 88      | Apr-99          | Apr-06 | Yes                     |
| Macdonald et al. (2012) [67]<br>CONSCIOUS-1 | Austria, Canada, Finland, France, Germany, Israel, Italy, Sweden, Switzerland, UK, USA | CONSCIOUS-1                                                            | 52             | RCT (post hoc) | 409     | 2005            | 2006   | -                       |
| Mahajan et al. (2014) [68]                  | India                                                                                  | -                                                                      | 1              | RCT            | 66      | -               | -      | Unclear                 |
| Matano et al. (2019) [69]                   | Japan                                                                                  | Tama Nagayama Hospital                                                 | 1              | RLC            | 333     | Jan-06          | 2016   | Unclear                 |
| Matsukawa et al. (2015) [70]                | Japan                                                                                  | Abashiri Neurosurgical Rehabilitation Hospital and Teishinkai Hospital | 2              | RLC            | 460     | Apr-96          | Apr-14 | Unclear                 |
| Mortimer et al. (2015) [71]                 | Australia                                                                              | Royal North Shore Hospital & Westmead Hospital                         | 2              | RLC            | 57      | Nov-09          | Dec-13 | Unclear                 |
| Orakdogan et al. (2016) [72]                | Turkey                                                                                 | Haydarpasa Numune Training and Research Hospital                       | 1              | RLC            | 104     | Jan-08          | Feb-14 | Unclear                 |
| Ozono et al. (2020) [73]                    | Japan                                                                                  | mWFNS Scale Project                                                    | 38             | RLC            | 1,124   | Oct-10          | Mar-13 | Unclear                 |
| Pegoli et al. (2015) [74]                   | USA                                                                                    | St. Mary's Hospital-Mayo Medical Center                                | 1              | RLC            | 381     | Feb-01          | Jun-13 | Yes                     |

| Author (date)<br>Study ID        | Country   | Data Source                                              | No. of<br>centers | Study design | No. pts | Data collection |        | Consecutive<br>recruitment |
|----------------------------------|-----------|----------------------------------------------------------|-------------------|--------------|---------|-----------------|--------|----------------------------|
|                                  |           |                                                          |                   |              |         | Start           | End    |                            |
| Rass et al. (2019)<br>[75]       | Austria   | Medical University of Innsbruck                          | 1                 | RLC          | 237     | 2010            | 2016   | Yes                        |
| Sokolowski et al.<br>(2018) [76] | USA       | University of Virginia Health<br>System                  | 1                 | RLC          | 159     | Aug-99          | Mar-15 | Yes                        |
| Szmuda et al.<br>(2013) [77]     | Poland    | Neurosurgery Department,<br>Medical University of Gdansk | 1                 | RCC          | 206     | 1997            | 2006   | Unclear                    |
| Voellger et al.<br>(2019) [78]   | Germany   | University Hospital Marburg                              | 1                 | RLC          | 176     | 2009            | 2017   | Unclear                    |
| Wong et al.<br>(2012) [79]       | Hong Kong | -                                                        | 4                 | PLC          | 90      | -               | -      | Yes                        |

**Abbreviations:** aSAH, aneurysmal subarachnoid hemorrhage; CONSCIOUS-1, Clazosentan to Overcome Neurological Ischemia and Infarction Occurring after Subarachnoid Hemorrhage; NIS, Nationwide Inpatient Sample; No., number; PLC, prospective longitudinal cohort; pts, patients; RCC, retrospective case control; RCT, randomized controlled trial; RLC, retrospective longitudinal cohort; VSP, vasospasm.

**Table S5.** VSP diagnosis per study

| Author (date)<br>Study ID         | Study design   | VSP diagnosis |              |              |                                                 |
|-----------------------------------|----------------|---------------|--------------|--------------|-------------------------------------------------|
|                                   |                | Angiographic  | DCI          | TCD          | VSP combined with DCI<br>or cerebral infarction |
| <b>Comparative studies</b>        |                |               |              |              |                                                 |
| Abulhasan et al. (2020) [21]      | RLC            | ✓             | ✓            | -            | ✓                                               |
| Appel et al. (2018) [22]          | PLC            | ✓             | -            | ✓            | ✓                                               |
| Athiraman et al. (2020) [23]      | RLC            | ✓             | ✓            | -            | ✓                                               |
| Brown et al. (2013) [24]          | RLC            | ✓             | -            | -            | -                                               |
| Budohoski et al. (2012) [25]      | PLC            | -             | ✓            | ✓            | ✓                                               |
| Ding et al. (2020) [26]           | PLC            | ✓             | -            | -            | -                                               |
| Ehlert et al. (2016) [27]         | RCC            | -             | ✓            | ✓            | -                                               |
| Filipce and Caparoski (2015) [28] | RLC            | Not reported  | Not reported | Not reported | Not reported                                    |
| Haegens et al. (2018) [29]        | RLC            | -             | -            | -            | ✓                                               |
| Hurth et al. (2020) [30]          | RLC            | ✓             | -            | ✓            | -                                               |
| Jeon et al. (2012) [31]           | RLC            | ✓             | ✓            | -            | -                                               |
| Karamchandani et al. (2014) [32]  | RLC            | ✓             | ✓            | -            | ✓                                               |
| Konczalla et al. (2016) [33]      | RLC            | ✓             | -            | ✓            | -                                               |
| Lee et al. (2019) [34]            | RLC            | ✓             | ✓            | ✓            | ✓                                               |
| Mortimer et al. (2015) [35]       | RCT (post hoc) | ✓             | -            | -            | -                                               |
| Sakr et al. (2016) [36]           | RCC            | ✓             | -            | ✓            | -                                               |
| Sanelli et al. (2012) [37]        | RLC            | ✓             | ✓            | -            | -                                               |
| Tekle et al. (2014) [38]          | RCC            | -             | -            | ✓            | -                                               |

| Author (date)<br>Study ID                | Study design   | VSP diagnosis |              |              |                                              |
|------------------------------------------|----------------|---------------|--------------|--------------|----------------------------------------------|
|                                          |                | Angiographic  | DCI          | TCD          | VSP combined with DCI or cerebral infarction |
| Uozumi et al. (2017) [39]                | RLC            | ✓             | -            | -            | -                                            |
| Vrsajkov et al. (2016) [40]              | PLC            | ✓             | -            | -            | -                                            |
| <b>Regression-based studies</b>          |                |               |              |              |                                              |
| Aldakkan et al. (2017) [41]              | RCT (post hoc) | ✓             | ✓            | ✓            | -                                            |
| Ali et al. (2018) [42]                   | PLC            | -             | ✓            | -            | -                                            |
| AlMatter et al. (2018) [43]              | RLC            | ✓             | -            | ✓            | -                                            |
| Al-Mufti et al. (2017) [44]              | PLC            | ✓             | -            | -            | -                                            |
| Ayling et al. (2016) [45]<br>CONSCIOUS-1 | RCT (post hoc) | ✓             | -            | -            | -                                            |
| Barges-Coll et al. (2013) [46]           | PLC            | ✓             | ✓            | ✓            | ✓                                            |
| Beadell et al. (2012) [47]               | RLC            | ✓             | -            | ✓            | -                                            |
| Brawanski et al. (2017) [49]             | RLC            | ✓             | -            | -            | -                                            |
| Brawanski et al. (2019) [48]             | RLC            | ✓             | ✓            | ✓            | -                                            |
| Chotai et al. (2021) [50]                | RCC            | Not reported  | Not reported | Not reported | Not reported                                 |
| Chou et al. (2010) [51]                  | RCC            | -             | ✓            | ✓            | -                                            |
| Cinotti et al. (2019) [52]               | PLC            | ✓             | -            | -            | -                                            |
| Darkwah Oppong et al. (2018) [53]        | RCC            | ✓             | ✓            | ✓            | -                                            |
| Dinc et al. (2019) [54]                  | RLC            | ✓             | -            | ✓            | -                                            |
| Drazin et al. (2015) [55]                | RCC            | -             | -            | ✓            | -                                            |
| Dumont et al. (2010) [56]<br>CONSCIOUS-1 | RCT (post hoc) | ✓             | -            | -            | -                                            |
| Fontana et al. (2018) [57]               | RLC            | ✓             | ✓            | ✓            | -                                            |

| Author (date)<br>Study ID                              | Study design   | VSP diagnosis |              |              |                                                 |
|--------------------------------------------------------|----------------|---------------|--------------|--------------|-------------------------------------------------|
|                                                        |                | Angiographic  | DCI          | TCD          | VSP combined with DCI<br>or cerebral infarction |
| Geraghty et al.<br>(2020) [58]                         | RLC            | ✓             | ✓            | ✓            | ✓                                               |
| Hosmann et al.<br>(2018) [59]                          | RLC            | ✓             | ✓            | ✓            | -                                               |
| Ibrahim et al.<br>(2012) [61]<br>CONSCIOUS-1           | RCT (post hoc) | ✓             | -            | -            | -                                               |
| Ibrahim and<br>Macdonald<br>(2013) [60]<br>CONSCIOUS-1 | RCT (post hoc) | ✓             | -            | -            | -                                               |
| Ido et al.<br>(2020) [62]                              | RLC            | Not reported  | Not reported | Not reported | Not reported                                    |
| Jabbarli et al.<br>(2016) [63]                         | RLC            | ✓             | -            | ✓            | -                                               |
| Kilbourn et al.<br>(2013) [64]                         | RLC            | ✓             | -            | ✓            | ✓                                               |
| Konczalla et al.<br>(2016) [65]                        | RLC            | ✓             | -            | -            | -                                               |
| Lannes et al.<br>(2012) [66]                           | RLC            | ✓             | ✓            | ✓            | -                                               |
| Macdonald et<br>al. (2012) [67]<br>CONSCIOUS-1         | RCT (post hoc) | ✓             | -            | -            | -                                               |
| Mahajan et al.<br>(2014) [68]                          | RCT            | -             | -            | ✓            | -                                               |
| Matano et al.<br>(2019) [69]                           | RLC            | ✓             | -            | -            | -                                               |
| Matsukawa et<br>al. (2015) [70]                        | RLC            | ✓             | ✓            | -            | ✓                                               |
| Mortimer et al.<br>(2015) [71]                         | RLC            | ✓             | -            | -            | -                                               |
| Orakdogan et<br>al. (2016) [72]                        | RLC            | -             | ✓            | ✓            | -                                               |
| Ozono et al.<br>(2020) [73]                            | RLC            | ✓             | ✓            | -            | -                                               |
| Pegoli et al.<br>(2015) [74]                           | RLC            | ✓             | ✓            | ✓            | ✓                                               |
| Rass et al.<br>(2019) [75]                             | RLC            | ✓             | ✓            | ✓            | ✓                                               |
| Sokolowski et<br>al. (2018) [76]                       | RLC            | ✓             | -            | -            | -                                               |

| Author (date)<br>Study ID      | Study design | VSP diagnosis |     |     |                                              |
|--------------------------------|--------------|---------------|-----|-----|----------------------------------------------|
|                                |              | Angiographic  | DCI | TCD | VSP combined with DCI or cerebral infarction |
| Szmuda et al.<br>(2013) [77]   | RCC          | ✓             | ✓   | -   | -                                            |
| Voellger et al.<br>(2019) [78] | RLC          | ✓             | -   | -   | -                                            |
| Wong et al.<br>(2012) [79]     | PLC          | ✓             | -   | -   | -                                            |

**Abbreviations:** CONSCIOUS-1, Clazosentan to Overcome Neurological Ischemia and Infarction Occurring after Subarachnoid Hemorrhage; DCI, delayed cerebral ischemia; PLC, prospective longitudinal cohort; RCC, retrospective case control; RCT, randomized controlled trial; RLC, retrospective longitudinal cohort; TCD, transcranial Doppler; VSP, vasospasm.



**Table S6.** Multivariate adjustments for regression-based studies

| Author (date)<br>Study ID                        | Study design   | Endpoint            | Adjusted Prognostic Factor |              |            |              |
|--------------------------------------------------|----------------|---------------------|----------------------------|--------------|------------|--------------|
|                                                  |                |                     | Age                        | Hypertension | WFNS grade | Fisher grade |
| Ali et al. (2018) [42]                           | PLC            | mRS score           | ✓                          | -            | -          | ✓            |
| AlMatter et al. (2018) [43]                      | RLC            | DCI                 | ✓                          | -            | -          | -            |
| Al-Mufti et al. (2017) [44]                      | PLC            | MoCA                | -                          | ✓            | -          | -            |
| Ayling et al. (2016) [45]<br>CONSCIOUS-1         | RCT (post hoc) | Cerebral infarction | -                          | ✓            | ✓          | -            |
|                                                  |                | GOS-E               | ✓                          | ✓            | ✓          | -            |
| Barges-Coll et al. (2013) [46]                   | PLC            | GOS                 | ✓                          | -            | ✓          | ✓            |
|                                                  |                | GOS                 | ✓                          | -            | -          | ✓            |
| Beadell et al. (2012) [47]                       | RLC            | Cerebral infarction | ✓                          | -            | -          | ✓            |
|                                                  |                | Cerebral infarction | ✓                          | -            | -          | ✓            |
| Brawanski et al. (2017) [49]                     | RLC            | mRS score           | -                          | -            | ✓          | ✓            |
| Brawanski et al. (2019) [48]                     | RLC            | mRS score           | ✓                          | -            | ✓          | -            |
| Chou et al. (2010) [51]                          | RCC            | Death               | ✓                          | -            | ✓          | -            |
| Cinotti et al. (2019) [52]                       | PLC            | mRS score           | ✓                          | -            | -          | -            |
| Darkwah Oppong et al. (2018) [53]                | RLC            | mRS score           | ✓                          | -            | ✓          | ✓            |
|                                                  |                | DCI                 | ✓                          | -            | ✓          | ✓            |
| Dinc et al. (2019) [54]                          | RLC            | mRS score           | -                          | -            | ✓          | ✓            |
| Drazin et al. (2015) [55]                        | RCC            | Death               | ✓                          | -            | ✓          | -            |
|                                                  |                | Death               | ✓                          | -            | ✓          | -            |
| Fontana et al. (2018) [57]                       | RLC            | GOS                 | ✓                          | -            | ✓          | -            |
|                                                  |                | GOS                 | ✓                          | -            | ✓          | -            |
| Hosmann et al. (2018) [59]                       | RLC            | Cerebral infarction | -                          | -            | -          | -            |
| Ibrahim et al. (2012) [61]<br>CONSCIOUS-1        | RCT (post hoc) | DCI                 | -                          | -            | ✓          | -            |
|                                                  |                | GOS-E               | -                          | -            | ✓          | -            |
| Ibrahim and Macdonald (2013) [60]<br>CONSCIOUS-1 | RCT (post hoc) | mRS score           | ✓                          | ✓            | ✓          | -            |

| Author (date)<br>Study ID                   | Study design   | Endpoint            | Adjusted Prognostic Factor |              |              |              |
|---------------------------------------------|----------------|---------------------|----------------------------|--------------|--------------|--------------|
|                                             |                |                     | Age                        | Hypertension | WFNS grade   | Fisher grade |
| Jabbarli et al. (2016) [63]                 | RLC            | mRS score           | ✓                          | -            | -            | ✓            |
| Kilbourn et al. (2013) [64]                 | RLC            | Death               | ✓                          | -            | -            | -            |
| Konczalla et al. (2016) [65]                | RLC            | mRS score           | ✓                          | -            | ✓            | ✓            |
| Lannes et al. (2012) [66]                   | RLC            | mRS score           | ✓                          | -            | -            | -            |
| Macdonald et al. (2012) [67]<br>CONSCIOUS-1 | RCT (post hoc) | MMSE                | ✓                          | ✓            | -            | -            |
| Mahajan et al. (2014) [68]                  | RCT            | MMSE                | Not reported               | Not reported | Not reported | Not reported |
| Matsukawa et al. (2015) [70]                | RLC            | GOS                 | ✓                          | -            | -            | -            |
| Mortimer et al. (2015) [71]                 | RLC            | Cerebral infarction | ✓                          | -            | -            | -            |
|                                             |                | mRS score           | ✓                          | -            | ✓            | -            |
| Orakdogan et al. (2016) [72]                | RLC            | Death               | ✓                          | -            | ✓            | -            |
| Ozono et al. (2020) [73]                    | RLC            | mRS score           | ✓                          | -            | ✓            | -            |
|                                             |                | Death               | ✓                          | -            | ✓            | -            |
| Rass et al. (2019) [75]                     | RLC            | mRS score           | ✓                          | -            | -            | ✓            |
| Sokolowski et al. (2018) [76]               | RLC            | mRS score           | ✓                          | ✓            | -            | -            |
| Szmuda et al. (2013) [77]                   | RCC            | GOS                 | ✓                          | ✓            | -            | ✓            |
| Voellger et al. (2019) [78]                 | RLC            | Death               | ✓                          | -            | -            | ✓            |
|                                             |                | GOS                 | ✓                          | -            | -            | ✓            |
| Wong et al. (2012) [79]                     | PLC            | MMSE                | ✓                          | -            | ✓            | ✓            |
|                                             |                | MoCA                | ✓                          | -            | ✓            | ✓            |
|                                             |                | mRS score           | ✓                          | -            | ✓            | ✓            |

**Abbreviations:** CONSCIOUS-1, Clazosentan to Overcome Neurological Ischemia and Infarction

Occurring after Subarachnoid Hemorrhage; DCI, delayed cerebral ischemia; GOS, Glasgow Outcome Scale; GOS-E, extended Glasgow Outcome Scale; MMSE, Mini-Mental State Examination; MoCA, Montreal Cognitive Assessment; mRS, modified Rankin scale; TCD, transcranial Doppler; VSP, vasospasm; WFNS, World Federation of Neurosurgical Societies.



**Table S7.** Patient characteristics at baseline: Age

| Author (date)<br>Study ID        | Study design   | Subgroup                              | No. pts | n | % | Mean  | Median | SD   | Range | IQR   |
|----------------------------------|----------------|---------------------------------------|---------|---|---|-------|--------|------|-------|-------|
| <b>Comparative studies</b>       |                |                                       |         |   |   |       |        |      |       |       |
| Abulhasan et al. (2020) [21]     | RLC            | No DCI                                | 212     | - | - | -     | 57     | -    | -     | 49–69 |
|                                  |                | With aVSP/DCI + standard therapy      | 89      | - | - | -     | 54     | -    | -     | 48–62 |
|                                  |                | With aVSP/DCI + rescue therapy        | 21      | - | - | -     | 52     | -    | -     | 49–56 |
| Appel et al. (2018) [22]         | PLC            | -                                     | 34      | - | - | 53.1  | -      | 12.5 | -     | -     |
| Athiraman et al. (2020) [23]     | RLC            | aVSP                                  | 97      | - | - | 55    | -      | 13   | -     | -     |
|                                  |                | No aVSP                               | 60      | - | - | 59    | -      | 15   | -     | -     |
| Brown et al. (2013) [24]         | RLC            | -                                     | 134     | - | - | 55    | -      | 14   | -     | -     |
| Budohoski et al. (2012) [25]     | PLC            | DCI                                   | 32      | - | - | 56    | -      | 10   | -     | -     |
|                                  |                | No DCI                                | 66      | - | - | 57    | -      | 12   | -     | -     |
| Ding et al. (2020) [26]          | PLC            | -                                     | 103     | - | - | 52.48 | -      | 10.1 | -     | -     |
| Ehlert et al. (2016) [27]        | RCC            | Molsidomine                           | 29      | - | - | 49    | -      | -    | 26–77 | -     |
|                                  |                | Standard therapy with TCD-defined VSP | 25      | - | - | 52    | -      | -    | 16–76 | -     |
|                                  |                | Standard therapy no TCD-defined VSP   | 20      | - | - | 64    | -      | -    | 42–86 | -     |
| Haegens et al. (2018) [29]       | RLC            | -                                     | 1647    | - | - | 56    | -      | 13   | -     | -     |
| Hurth et al. (2020) [30]         | RLC            | -                                     | 138     | - | - | -     | 53     | -    | -     | -     |
| Jeon et al. (2012) [31]          | RLC            | No aVSP                               | 65      | - | - | 58    | -      | 14   | -     | -     |
|                                  |                | aVSP                                  | 26      | - | - | 54    | -      | 14   | -     | -     |
| Karamchandani et al. (2014) [32] | RLC            | -                                     | 259     | - | - | 55    | -      | 13   | 23–90 | -     |
| Konczalla et al. (2016) [33]     | RLC            | Long-lasting cerebral VSP             | 106     | - | - | 53    | -      | 12   | -     | -     |
| Lee et al. (2019) [34]           | RLC            | DCI                                   | 97      | - | - | 54.62 | -      | 11.6 | -     | -     |
|                                  |                | No DCI                                | 366     | - | - | 56.35 | -      | 13.6 | -     | -     |
| Mortimer et al. (2015) [35]      | RCT (post hoc) | None/mild aVSP                        | 63      | - | - | 56.5  | -      | 3.5  | -     | -     |
|                                  |                | Severe aVSP                           | 17      | - | - | 48.9  | -      | 6.2  | -     | -     |

| Author (date)<br>Study ID                | Study design   | Subgroup                           | No. pts | n   | %   | Mean  | Median | SD   | Range | IQR |
|------------------------------------------|----------------|------------------------------------|---------|-----|-----|-------|--------|------|-------|-----|
| Sakr et al. (2016) [36]                  | RCC            | -                                  | 142     | -   | -   | 54    | -      | 14   | -     | -   |
| Sanelli et al. (2012) [37]               | RLC            | -                                  | 137     | -   | -   | -     | 52     | -    | 24–88 | -   |
| Tekle et al. (2014) [38]                 | RCC            | No new symptomatic TCD-defined VSP | 30      | -   | -   | 52    | -      | 12.8 | -     | -   |
|                                          |                | New symptomatic TCD-defined VSP    | 11      | -   | -   | 43    | -      | 11.2 | -     | -   |
| Uozumi et al. (2017) [39]                | RLC            | No aVSP                            | 70      | -   | -   | 56.6  | -      | -    | 25–85 | -   |
|                                          |                | aVSP                               | 27      | -   | -   | 65    | -      | -    | 46–87 | -   |
| Vrsajkov et al. (2016) [40]              | PLC            | aVSP                               | 29      | -   | -   | 53.3  | -      | 9.2  | -     | -   |
|                                          |                | No aVSP                            | 25      | -   | -   | 55.4  | -      | 10.6 | -     | -   |
| <b>Regression-based studies</b>          |                |                                    |         |     |     |       |        |      |       |     |
| Aldakkan et al. (2017) [41]              | RCT (post hoc) | -                                  | 4125    | -   | -   | 51.33 | -      | 13.3 | -     | -   |
| Ali et al. (2018) [42]                   | PLC            | -                                  | 82      | -   | -   | 49.6  | -      | 9.1  | -     | -   |
| AlMatter et al. (2018) [43]              | RLC            | <20 years                          | 693     | 3   | 0.4 | -     | -      | -    | -     | -   |
|                                          |                | 20-30 years                        | 693     | 16  | 2.3 | -     | -      | -    | -     | -   |
|                                          |                | 31-40 years                        | 693     | 58  | 8.4 | -     | -      | -    | -     | -   |
|                                          |                | 41-50 years                        | 693     | 166 | 24  | -     | -      | -    | -     | -   |
|                                          |                | 51-60 years                        | 693     | 202 | 29  | -     | -      | -    | -     | -   |
|                                          |                | 61-70 years                        | 693     | 114 | 17  | -     | -      | -    | -     | -   |
|                                          |                | 71-80 years                        | 693     | 95  | 14  | -     | -      | -    | -     | -   |
|                                          |                | >80 years                          | 693     | 39  | 5.6 | -     | -      | -    | -     | -   |
| Al-Mufti et al. (2017) [44]              | PLC            | With ultra-early aVSP, >53 years   | 59      | 22  | 37  | -     | -      | -    | -     | -   |
|                                          |                | No ultra-early aVSP, >53 years     | 1227    | 675 | 55  | -     | -      | -    | -     | -   |
| Ayling et al. (2016) [45]<br>CONSCIOUS-1 | RCT (post hoc) | Early infarct                      | 76      | -   | -   | 51.14 | -      | 10.7 | -     | -   |
|                                          |                | Delayed infarct                    | 79      | -   | -   | 51.66 | -      | 11.2 | -     | -   |
|                                          |                | Both early & delayed infarcts      | 36      | -   | -   | 52.22 | -      | 10.8 | -     | -   |
|                                          |                | No infarct                         | 222     | -   | -   | 50.5  | -      | 10.7 | -     | -   |
| Barges-Coll et al. (2013) [46]           | PLC            | -                                  | 40      | -   | -   | 47.3  | -      | 2    | -     | -   |

| Author (date)<br>Study ID                           | Study design      | Subgroup                  | No. pts | n | % | Mean | Median | SD   | Range | IQR   |
|-----------------------------------------------------|-------------------|---------------------------|---------|---|---|------|--------|------|-------|-------|
| Beadell et al.<br>(2012) [47]                       | RLC               | Methamphetamine users     | 28      | - | - | 45.2 | -      | 7.3  | -     | -     |
|                                                     |                   | Non-methamphetamine users | 346     | - | - | 55.9 | -      | 12.9 | -     | -     |
|                                                     |                   | Control                   | 28      | - | - | 45.2 | -      | 7.3  | -     | -     |
| Brawanski et al.<br>(2017) [49]                     | RLC               | -                         | 471     | - | - | 53.7 | -      | 13.7 | -     | -     |
| Chotai et al.<br>(2021) [50]                        | RCC               | -                         | 5353    | - | - | -    | 55     | -    | 46–64 | -     |
| Chou et al.<br>(2010) [51]                          | RCC               | TCD-defined VSP           | 116     | - | - | 50.6 | -      | 13   | -     | -     |
|                                                     |                   | No TCD-defined VSP        | 73      | - | - | 58.8 | -      | 15.3 | -     | -     |
| Cinotti et al.<br>(2019) [52]                       | PLC               | -                         | 208     | - | - | -    | 55     | -    | -     | 45–65 |
| Darkwah Oppong et al.<br>(2018) [53]                | RLC               | -                         | 994     | - | - | 55   | -      | 14   | -     | -     |
| Drazin et al.<br>(2015) [55]                        | RCC               | Direct-admit              | 31      | - | - | 57.2 | 58     | -    | 32–90 | 44–66 |
|                                                     |                   | Transfer                  | 76      | - | - | 54.9 | 54     | -    | 23–83 | 45–66 |
| Dumont et al.<br>(2010) [56]<br>CONSCIOUS-1         | RCT<br>(post hoc) | -                         | 413     | - | - | 51   | -      | 11   | -     | -     |
| Fontana et al.<br>(2018) [57]                       | RLC               | -                         | 270     | - | - | -    | 54     | -    | -     | 45–66 |
| Geraghty et al.<br>(2020) [58]                      | RLC               | -                         | 105     | - | - | 51.6 | -      | 11.9 | -     | -     |
| Hosmann et al.<br>(2018) [59]                       | RLC               | -                         | 80      | - | - | 46.9 | -      | 8.9  | -     | -     |
| Ibrahim and Macdonald<br>(2013) [60]<br>CONSCIOUS-1 | RCT<br>(post hoc) | Received colloids         | 41      | - | - | 55.3 | 9.6    | -    | -     | -     |
|                                                     |                   | Did not receive colloids  | 82      | - | - | 55.8 | 9.6    | -    | -     | -     |
| Ido et al. (2020)<br>[62]                           | RLC               | Age <75 years             | 13548   | - | - | 57   | -      | 11.3 | -     | -     |
|                                                     |                   | Age ≥75 years             | 3885    | - | - | 80.9 | -      | 4.5  | -     | -     |
| Jabbarli et al.<br>(2016) [63]                      | RLC               | -                         | 531     | - | - | 55.4 | -      | -    | 21-94 | -     |
| Kilbourn et al.<br>(2013) [64]                      | RLC               | -                         | 299     | - | - | 55   | -      | 13.8 | -     | -     |
| Konczalla et al.<br>(2016) [65]                     | RLC               | -                         | 193     | - | - | 55.2 | -      | -    | -     | -     |

| Author (date)<br>Study ID                   | Study design   | Subgroup         | No. pts | n | % | Mean  | Median | SD   | Range | IQR   |
|---------------------------------------------|----------------|------------------|---------|---|---|-------|--------|------|-------|-------|
| Lannes et al. (2012) [66]                   | RLC            | -                | 88      | - | - | 53.4  | -      | 11.5 | 34–78 | -     |
| Macdonald et al. (2012) [67]<br>CONSCIOUS-1 | RCT (post hoc) | Total population | 409     | - | - | 51.1  | -      | 10.7 | -     | -     |
| Mahajan et al. (2014) [68]                  | RCT            | No propofol      | 32      | - | - | 44.2  | -      | 12.6 | -     | -     |
|                                             |                | Propofol         | 34      | - | - | 44.9  | -      | 9.6  | -     | -     |
| Matano et al. (2019) [69]                   | RLC            | -                | 333     | - | - | 59.7  | -      | -    | 24–93 | -     |
| Matsukawa et al. (2015) [70]                | RLC            | -                | 460     | - | - | 62    | -      | 14   | -     | -     |
| Mortimer et al. (2015) [71]                 | RLC            | -                | 57      | - | - | 50.4  | -      | 3    | -     | -     |
| Orakdogan et al. (2016) [72]                | RLC            | -                | 104     | - | - | 51.79 | 51.5   | 12.8 | 16–84 | -     |
| Ozono et al. (2020) [73]                    | RLC            | Age <65          | 613     | - | - | 52.5  | 55     | 9.1  | -     | 46–60 |
|                                             |                | Age ≥65          | 511     | - | - | 74.3  | 74     | 6.6  | -     | 68–79 |
| Pegoli et al. (2015) [74]                   | RLC            | -                | 381     | - | - | 55.8  | -      | 13.3 | -     | -     |
| Rass et al. (2019) [75]                     | RLC            | -                | 237     | - | - | -     | 57     | -    | -     | 47–67 |
| Sokolowski et al. (2018) [76]               | RLC            | -                | 159     | - | - | 51.8  | -      | 11.9 | -     | -     |
| Szmuda et al. (2013) [77]                   | RCC            | -                | 206     | - | - | 51.6  | -      | 12.5 | -     | -     |
| Voellger et al. (2019) [78]                 | RLC            | -                | 176     | - | - | 56    | -      | -    | 22–90 | -     |
| Wong et al. (2012) [79]                     | PLC            | -                | 90      | - | - | 54    | -      | 11   | -     | -     |

**Abbreviations:** aVSP, angiographic vasospasm; CONSCIOUS-1, Clazosentan to Overcome Neurological Ischemia and Infarction Occurring after Subarachnoid Hemorrhage; DCI, delayed cerebral ischemia; IQR, interquartile range; n, number; No., number; PLC, prospective longitudinal cohort; pts, patients; RCC, retrospective case control; RCT, randomized controlled trial; RLC, retrospective longitudinal cohort; SD, standard deviation; TCD, transcranial Doppler; VSP, vasospasm.

**Table S8.** Patient characteristics at baseline: Pre-existing hypertension

| Author (date)<br>Study ID                | Study design   | Subgroup                           | No. pts | n   | %    |
|------------------------------------------|----------------|------------------------------------|---------|-----|------|
| <b>Comparative studies</b>               |                |                                    |         |     |      |
| Appel et al. (2018) [22]                 | PLC            | DCI                                | 14      | 5   | 36   |
|                                          |                | No DCI                             | 20      | 9   | 45   |
| Brown et al. (2013) [24]                 | RLC            | Delayed infarct                    | 20      | 8   | 40   |
|                                          |                | No infarct                         | 114     | 53  | 47   |
| Ding et al. (2020) [26]                  | PLC            | aVSP                               | 52      | 28  | 54   |
|                                          |                | No aVSP                            | 51      | 19  | 37   |
| Jeon et al. (2012) [31]                  | RLC            | No aVSP                            | 65      | 34  | 52   |
|                                          |                | aVSP                               | 26      | 11  | 42   |
| Karamchandani et al. (2014) [32]         | RLC            | No DCI                             | 165     | 72  | 44   |
|                                          |                | DCI                                | 94      | 49  | 52   |
| Lee et al. (2019) [34]                   | RLC            | DCI                                | 97      | 42  | 43   |
|                                          |                | No DCI                             | 366     | 171 | 47   |
| Mortimer et al. (2015) [35]              | RCT (post hoc) | None/mild aVSP                     | 63      | 20  | 32   |
|                                          |                | Severe aVSP                        | 17      | 5   | 29   |
| Tekle et al. (2014) [38]                 | RCC            | No new symptomatic TCD-defined VSP | 30      | 11  | 37   |
|                                          |                | New symptomatic TCD-defined VSP    | 11      | 7   | 64   |
| Vrsajkov et al. (2016) [40]              | PLC            | aVSP                               | 29      | 18  | 62   |
|                                          |                | No aVSP                            | 25      | 11  | 44   |
| <b>Regression-based studies</b>          |                |                                    |         |     |      |
| Al-Mufti et al. (2017) [44]              | PLC            | With ultra-early aVSP              | 59      | 27  | 46   |
|                                          |                | No ultra-early aVSP                | 1227    | 585 | 49   |
| Ayling et al. (2016) [45]<br>CONSCIOUS-1 | RCT (post hoc) | Early infarct                      | 76      | 36  | 47   |
|                                          |                | Delayed infarct                    | 79      | 40  | 51   |
|                                          |                | Both early & delayed infarcts      | 36      | 17  | 47   |
|                                          |                | No infarct                         | 222     | 82  | 37   |
| Chou et al. (2010) [51]                  | RCC            | TCD-defined VSP                    | 116     | 61  | 52.6 |
|                                          |                | No TCD-defined VSP                 | 73      | 34  | 46.6 |
| Cinotti et al. (2019) [52]               | PLC            | -                                  | 208     | 75  | 36   |
| Drazin et al. (2015) [55]                | RCC            | Direct-admit                       | 31      | 16  | 53.3 |
|                                          |                | Transfer                           | 76      | 43  | 57.3 |



| Author (date)<br>Study ID                        | Study design      | Subgroup      | No. pts | n    | %    |
|--------------------------------------------------|-------------------|---------------|---------|------|------|
| <b>Comparative studies</b>                       |                   |               |         |      |      |
| Dumont et al. (2010) [56]<br>CONSCIOUS-1         | RCT<br>(post hoc) | -             | 413     | 172  | 42   |
| Fontana et al. (2018) [57]                       | RLC               | -             | 270     | 114  | 42   |
| Ibrahim and Macdonald (2013) [60]<br>CONSCIOUS-1 | RCT<br>(post hoc) | -             | 413     | 175  | 42   |
| Ido et al. (2020) [62]                           | RLC               | Age <75 years | 13548   | 7421 | 55   |
|                                                  |                   | Age ≥75 years | 3885    | 2231 | 57   |
| Kilbourn et al. (2013) [64]                      | RLC               | -             | 299     | 128  | 43   |
| Lannes et al. (2012) [66]                        | RLC               | -             | 88      | 16   | 18   |
| Mahajan et al. (2014) [68]                       | RCT               | No propofol   | 32      | 9    | 28.1 |
|                                                  |                   | Propofol      | 34      | 12   | 35.3 |
| Mortimer et al. (2015) [71]                      | RLC               | -             | 57      | 18   | 32   |
| Pegoli et al. (2015) [74]                        | RLC               | -             | 381     | 212  | 56   |
| Sokolowski et al. (2018) [76]                    | RLC               | -             | 103     | 79   | 77   |

**Abbreviations:** aVSP, angiographic vasospasm; CONSCIOUS-1, Clazosentan to Overcome Neurological Ischemia and Infarction Occurring after Subarachnoid Hemorrhage; DCI, delayed cerebral ischemia; n, number; No., number; PLC, prospective longitudinal cohort; pts, patients; RCC, retrospective case control; RCT, randomized controlled trial; RLC, retrospective longitudinal cohort; TCD, transcranial Doppler; VSP, vasospasm.

**Table S9.** Patient characteristics at baseline: Fisher grade

| Author (date)<br>Study ID       | Study design   | Subgroup                              | No. pts | Mean | Median | Range | Grade (%) |    |    |     |        |      |      |
|---------------------------------|----------------|---------------------------------------|---------|------|--------|-------|-----------|----|----|-----|--------|------|------|
|                                 |                |                                       |         |      |        |       | 1         | 2  | 3  | 4   | 1-2, 4 | <1mm | >1mm |
| <b>Comparative studies</b>      |                |                                       |         |      |        |       |           |    |    |     |        |      |      |
| Appel et al. (2018) [22]        | PLC            | DCI                                   | 14      | -    | -      | -     | -         | -  | -  | 64  | -      | -    | -    |
|                                 |                | No DCI                                | 20      | -    | -      | -     | -         | -  | -  | 50  |        |      |      |
| Ehlert et al. (2016) [27]       | RCC            | Molsidomine                           | 29      | 4    | -      | 1-4   | -         | -  | -  | -   | -      | -    | -    |
|                                 |                | Standard therapy with TCD-defined VSP | 25      | 4    | -      | 2-4   | -         | -  | -  | -   | -      | -    | -    |
|                                 |                | Standard therapy no TCD-defined VSP   | 20      | 4    | -      | 1-4   | -         | -  | -  | -   | -      | -    | -    |
| Hurth et al. (2020) [30]        | RLC            | -                                     | 138     | -    | -      | -     | 0.7       | 13 | 27 | 59  | -      | -    | -    |
| Jeon et al. (2012) [31]         | RLC            | No aVSP                               | 65      | -    | -      | -     | -         | -  | 34 | -   | 66     | -    | -    |
|                                 |                | aVSP                                  | 26      | -    | -      | -     | -         | -  | 58 | -   | 42     | -    | -    |
| Konczalla et al. (2016) [33]    | RLC            | -                                     | 106     | -    | -      | -     | -         | -  | 76 | -   | -      | -    | -    |
| Sakr et al. (2016) [36]         | RCC            | -                                     | 142     | -    | -      | -     | 0.7       | 12 | 23 | 65  | -      | -    | -    |
| Uozumi et al. (2017) [39]       | RLC            | No aVSP                               | 70      | -    | -      | -     | -         | -  | 80 | 20  | -      | -    | -    |
|                                 |                | aVSP                                  | 27      | -    | -      | -     | -         | -  | 74 | 26  | -      | -    | -    |
| <b>Regression-based studies</b> |                |                                       |         |      |        |       |           |    |    |     |        |      |      |
| Aldakkan et al. (2017) [41]     | RCT (post hoc) | -                                     | 190     | -    | -      | -     | 31        |    | 70 |     |        |      | -    |
| Ali et al. (2018) [42]          | PLC            | -                                     | 82      | -    | -      | -     | 13        | 60 | 22 | 4.9 | -      | -    | -    |

| Author (date)<br>Study ID         | Study design | Subgroup                   | No. pts | Mean | Median | Range | Grade (%) |      |      |      |        |      |      |
|-----------------------------------|--------------|----------------------------|---------|------|--------|-------|-----------|------|------|------|--------|------|------|
|                                   |              |                            |         |      |        |       | 1         | 2    | 3    | 4    | 1-2, 4 | <1mm | >1mm |
| AlMatter et al. (2018) [43]       | RLC          | -                          | 693     | -    | -      | -     | 4.5       | 10.1 | 16.5 | 68.8 | -      | -    | -    |
| Barges-Coll et al. (2013) [46]    | PLC          | -                          | 40      | -    | -      | -     | 5         | 13   | 40   | 43   | -      | -    | -    |
| Beadell et al. (2012) [47]        | RLC          | Methamphetamine users      | 28      | -    | 4      | -     | -         | -    | -    | -    | -      | -    | -    |
|                                   |              | Non-methamphetamine users  | 346     | -    | 3      | -     | -         | -    | -    | -    | -      | -    | -    |
|                                   |              | Control                    | 28      | -    | 3      | -     | -         | -    | -    | -    | -      | -    | -    |
| Brawanski et al. (2017) [49]      | RLC          | -                          | 471     | -    | -      | -     | -         | -    | 72.2 | -    | -      | -    |      |
| Chou et al. (2010) [51]           | RCC          | TCD-defined VSP            | 116     | -    | -      | -     | 5.2       | 7.8  | 57.8 | 29.3 | -      | -    | -    |
|                                   |              | No TCD-defined VSP         | 73      | -    | -      | -     | 9.6       | 13.7 | 54.8 | 21.9 | -      | -    | -    |
| Cinotti et al. (2019) [52]        | PLC          | Good neurological recovery | 138     | -    | -      | -     | 4.3       | 26.1 | 16.7 | 52.9 | -      | -    | -    |
|                                   |              | Poor neurological recovery | 70      | -    | -      | -     | 0         | 1.4  | 12.9 | 85.7 | -      | -    | -    |
| Darkwah Oppong et al. (2018) [53] | RLC          | -                          | 994     | -    | -      | -     | -         | -    | 86.5 | -    | -      | -    |      |
| Dinc et al. (2019) [54]           | RLC          | -                          | 74      | -    | -      | -     | 35        |      | 65   | -    | -      | -    |      |
| Drazin et al. (2015) [55]         | RCC          | Direct-admit               | 31      | -    | -      | -     |           |      | 77.4 |      |        |      |      |
|                                   |              | Transfer                   | 76      | -    | -      | -     |           |      | 75   |      |        |      |      |
| Fontana et al. (2018) [57]        | RLC          | -                          | 270     | -    | 4      | -     | -         | -    | -    | -    | -      | -    |      |
| Konczalla et al. (2016) [65]      | RLC          | -                          | 193     | -    | -      | -     | -         | -    | -    | -    | -      | -    |      |
| Mahajan et al. (2014) [68]        | RCT          | No propofol                | 32      | -    | -      | -     | 18.8      | 40.6 | 18.8 | 21.9 | -      | -    | -    |
|                                   |              | Propofol                   | 34      | -    | -      | -     | 14.7      | 44.1 | 11.8 | 29.4 | -      | -    | -    |

| Author (date)<br>Study ID     | Study design | Subgroup | No.<br>pts | Mean | Median | Range | Grade (%) |      |      |      |        |      |      |
|-------------------------------|--------------|----------|------------|------|--------|-------|-----------|------|------|------|--------|------|------|
|                               |              |          |            |      |        |       | 1         | 2    | 3    | 4    | 1-2, 4 | <1mm | >1mm |
| Mortimer et al. (2015) [71]   | RLC          | -        | 57         | -    | -      | -     | 0         | 1.8  | 87.7 | 10.5 | -      | -    | -    |
| Orakdogan et al. (2016) [72]  | RLC          | -        | 104        | -    | -      | -     | -         | -    | -    | -    | -      | 37   | 29   |
| Ozono et al. (2020) [73]      | RLC          | Age <65  | 613        | -    | -      | -     | 4.9       | 14   | 80.8 | 0.3  | -      | -    | -    |
|                               |              | Age ≥65  | 511        | -    | -      | -     | 5.7       | 12.4 | 81.5 | 0.4  | -      | -    | -    |
| Sokolowski et al. (2018) [76] | RLC          | -        | 157        | -    | -      | -     | 3.8       | 14   | 19.1 | 63.1 | -      | -    | -    |
| Szmuda et al. (2013) [77]     | RCC          | -        | 206        | -    | -      | -     | 3.4       | 59   | 31   | 2.9  | -      | -    | -    |
| Wong et al. (2012) [79]       | PLC          | -        | 90         | -    | -      | -     | -         | -    | 100  | -    | -      | -    | -    |

**Abbreviations:** aVSP, angiographic vasospasm; DCI, delayed cerebral ischemia; No., number; PLC, prospective longitudinal cohort; pts, patients; RCC, retrospective case control; RCT, randomized controlled trial; RLC, retrospective longitudinal cohort; TCD, transcranial Doppler; VSP, vasospasm.

**Table S10.** Patient characteristics at baseline: Modified Fisher grade

| Author (date)<br>Study ID        | Study design | Subgroup                         | No. pts | Median | IQR | Grade (%) |    |     |    |    |
|----------------------------------|--------------|----------------------------------|---------|--------|-----|-----------|----|-----|----|----|
|                                  |              |                                  |         |        |     | 0         | 1  | 2   | 3  | 4  |
| <b>Comparative studies</b>       |              |                                  |         |        |     |           |    |     |    |    |
| Abulhasan et al. (2020) [21]     | RLC          | No DCI                           | 211     | -      | -   | -         | -  | -   | 81 |    |
|                                  |              | With aVSP/DCI + standard therapy | 89      | -      | -   | -         | -  | -   | 93 |    |
|                                  |              | With aVSP/DCI + rescue therapy   | 21      | -      | -   | -         | -  | -   | 81 |    |
| Athiraman et al. (2020) [23]     | RLC          | aVSP                             | 97      | 3      | 3-4 | -         | -  | -   | -  | -  |
|                                  |              | No aVSP                          | 60      | 3      | 3-4 | -         | -  | -   | -  | -  |
|                                  |              | DCI                              | 63      | 3      | 3-4 | -         | -  | -   | -  | -  |
|                                  |              | No DCI                           | 94      | 3      | 3-4 | -         | -  | -   | -  | -  |
| Brown et al. (2013) [24]         | RLC          | Delayed infarct                  | 20      | -      | -   | 5         |    |     | 95 |    |
|                                  |              | No infarct                       | 114     | -      | -   | 12        |    |     | 88 |    |
| Budohoski et al. (2012) [25]     | PLC          | DCI                              | 32      | -      | -   | -         | 13 | 13  | 59 | 16 |
|                                  |              | No DCI                           | 66      | -      | -   | -         | 27 | 7.6 | 39 | 26 |
| Ding et al. (2020) [26]          | PLC          | aVSP                             | 52      | 3      | 2-4 | -         | -  | -   | -  | -  |
|                                  |              | No aVSP                          | 51      | 2      | 2-3 | -         | -  | -   | -  | -  |
| Karamchandani et al. (2014) [32] | RLC          | No DCI                           | 165     | -      | -   | -         | -  | 11  | 73 | 16 |
|                                  |              | DCI                              | 94      | -      | -   | -         | -  | 3   | 53 | 44 |
| Lee et al. (2019) [34]           | RLC          | DCI                              | 97      | -      | -   | 11        |    | 8.3 | 22 | 59 |
|                                  |              | No DCI                           | 366     | -      | -   | 30        |    | 21  | 13 | 37 |
| <b>Regression-based studies</b>  |              |                                  |         |        |     |           |    |     |    |    |
| Geraghty et al. (2020) [58]      | RLC          | -                                | 105     | 3      | 3   | -         | -  | -   | -  | -  |

|                             |     |   |     |   |   |     |     |      |      |    |
|-----------------------------|-----|---|-----|---|---|-----|-----|------|------|----|
| Lannes et al. (2012) [66]   | RLC | - | 88  | - | - | -   | 4.6 | 11.5 | 37.9 | 46 |
| Rass et al. (2019) [75]     | RLC | - | 237 | - | - | -   | 12  | 16   | 25   | 47 |
| Voellger et al. (2019) [78] | RLC | - | 176 | - | - | 3.4 | 8.5 | 6.3  | 32   | 50 |

**Abbreviations:** aVSP, angiographic vasospasm; DCI, delayed cerebral ischemia; No., number; PLC, prospective longitudinal cohort; pts, patients; RLC, retrospective longitudinal cohort; VSP, vasospasm.

**Table S11.** Patient characteristics at baseline: WFNS grade

| Author (date)<br>Study ID    | Study design   | Subgroup                         | No. pts | Mean (SD) | Median (IQR) | WFNS grade (%) |     |     |      |      |
|------------------------------|----------------|----------------------------------|---------|-----------|--------------|----------------|-----|-----|------|------|
|                              |                |                                  |         |           |              | 1              | 2   | 3   | 4    | 5    |
| <b>Comparative studies</b>   |                |                                  |         |           |              |                |     |     |      |      |
| Abulhasan et al. (2020) [21] | RLC            | No DCI                           | 212     | -         | -            | -              | -   | 47  |      |      |
|                              |                | With aVSP/DCI + standard therapy | 89      | -         | -            | -              | -   | 67  |      |      |
|                              |                | With aVSP/DCI + rescue therapy   | 21      | -         | -            | -              | -   | 43  |      |      |
| Appel et al. (2018) [22]     | PLC            | DCI                              | 14      | -         | -            | -              | -   | -   | 71   |      |
|                              |                | No DCI                           | 20      | -         | -            | -              | -   | -   | 40   |      |
| Brown et al. (2013) [24]     | RLC            | Delayed infarct                  | 20      | -         | -            | 60             |     |     | 40   |      |
|                              |                | No infarct                       | 114     | -         | -            | 70             |     |     | 30   |      |
| Budohoski et al. (2012) [25] | PLC            | DCI                              | 32      | -         | -            | 34             | 22  | 3.1 | 31   | 9.4  |
|                              |                | No DCI                           | 66      | -         | -            | 35             | 33  | 7.6 | 17   | 7.6  |
| Ding et al. (2020) [26]      | PLC            | -                                | 103     | -         | -            | 43             | 2.9 | 12  | 25   | 17   |
| Haegens et al. (2018) [29]   | RLC            | -                                | 1647    | -         | -            | -              | -   | -   | 45   |      |
| Hurth et al. (2020) [30]     | RLC            | -                                | 138     | -         | -            | 31             | 20  | 4   | 20   | 25   |
| Jeon et al. (2012) [31]      | RLC            | No aVSP                          | 65      | -         | -            | 72             | 11  |     | 17   |      |
|                              |                | aVSP                             | 26      | -         | -            | 46             | 19  |     | 35   |      |
| Konczalla et al. (2016) [33] | RLC            | -                                | 106     | -         | -            | 21.7           | 17  | 4.7 | 14.2 | 42.5 |
| Lee et al. (2019) [34]       | RLC            | DCI                              | 97      | -         | -            | 36             | 19  | 8.3 | 21   | 17   |
|                              |                | No DCI                           | 366     | -         | -            | 54             | 12  | 4.1 | 17   | 12   |
|                              | RCT (post hoc) | None/mild aVSP                   | 63      | -         | -            | -              | 30  | -   | -    | -    |

| Author (date)<br>Study ID                | Study design   | Subgroup                      | No. pts | Mean (SD)   | Median (IQR) | WFNS grade (%) |     |     |      |      |
|------------------------------------------|----------------|-------------------------------|---------|-------------|--------------|----------------|-----|-----|------|------|
|                                          |                |                               |         |             |              | 1              | 2   | 3   | 4    | 5    |
| Mortimer et al. (2015) [35]              |                | Severe aVSP                   | 17      | -           | -            | -              | 65  | -   | -    | -    |
| Sakr et al. (2016) [36]                  | RCC            | -                             | 142     | -           | -            | 25             | 23  | 9.2 | 20   | 23   |
| Uozumi et al. (2017) [39]                | RLC            | No aVSP                       | 70      | -           | -            | 46             |     | 54  |      | -    |
|                                          |                | aVSP                          | 27      | -           | -            | 33             |     | 67  |      | -    |
| Vrsajkov et al. (2016) [40]              | PLC            | aVSP                          | 29      | 2.14 (1.22) | -            | -              | -   | -   | -    | -    |
|                                          |                | No aVSP                       | 25      | 1.68 (0.98) | -            | -              | -   | -   | -    | -    |
| <b>Regression-based studies</b>          |                |                               |         |             |              |                |     |     |      |      |
| Aldakkan et al. (2017) [41]              | RCT (post hoc) | -                             | 191     | -           | -            | 51             | 49  | -   | -    | -    |
| Ali et al. (2018) [42]                   | PLC            | -                             | 82      | -           | -            | 38             | 38  | 24  | -    | -    |
| Ayling et al. (2016) [45]<br>CONSCIOUS-1 | RCT (post hoc) | Early infarct                 | 76      | -           | -            | 71             |     |     | -    | -    |
|                                          |                | Delayed infarct               | 79      | -           | -            | 67             |     |     | -    | -    |
|                                          |                | Both early & delayed infarcts | 36      | -           | -            | 67             |     |     | -    | -    |
|                                          |                | No infarct                    | 222     | -           | -            | 82             |     |     | -    | -    |
| Barges-Coll et al. (2013) [46]           | PLC            | -                             | 40      | -           | -            | 100            |     | -   | -    | -    |
| Brawanski et al. (2017) [49]             | RLC            | -                             | 471     | -           | -            | 63.5           |     |     | -    | -    |
| Cinotti et al. (2019) [52]               | PLC            | Good neurological recovery    | 138     | -           | -            | 44.9           | 21  | 8   | 13.8 | 12.3 |
|                                          |                | Poor neurological recovery    | 70      | -           | -            | 4.3            | 7.1 | 2.9 | 31.4 | 54.3 |
| Darkwah Oppong et al. (2018) [53]        | RLC            | -                             | 994     | -           | -            | -              | -   | -   | 43.2 |      |



| Author (date)<br>Study ID             | Study design   | Subgroup             | No. pts | Mean (SD) | Median (IQR) | WFNS grade (%) |      |      |      |      |
|---------------------------------------|----------------|----------------------|---------|-----------|--------------|----------------|------|------|------|------|
|                                       |                |                      |         |           |              | 1              | 2    | 3    | 4    | 5    |
| Dinc et al. (2019) [54]               | RLC            | -                    | 74      | -         | -            | -              | -    | -    | 51   |      |
| Dumont et al. (2010) [56] CONSCIOUS-1 | RCT (post hoc) | -                    | 413     | -         | -            | 76             |      |      | 24   |      |
| Fontana et al. (2018) [57]            | RLC            | Favourable outcome   | 161     | -         | 1 (1-2)      | -              | -    | -    | -    | -    |
|                                       |                | Unfavourable outcome | 109     | -         | 5 (2-5)      | -              | -    | -    | -    | -    |
| Konczalla et al. (2016) [65]          | RLC            | -                    | 193     | -         | -            | 59             |      |      | -    | -    |
| Matsukawa et al. (2015) [70]          | RLC            | -                    | 460     | -         | -            | 19             | 33   | 11   | 24   | 14   |
| Mortimer et al. (2015) [71]           | RLC            | -                    | 57      | -         | -            | 19.3           | 14   | 10.5 | 22.8 | 33.3 |
| Orakdogan et al. (2016) [72]          | RLC            | -                    | 104     | -         | -            | 82.7           |      |      | 17.3 |      |
| Pegoli et al. (2015) [74]             | RLC            | -                    | 381     | 2.3 (1.5) | -            | -              | -    | -    | -    | -    |
| Sokolowski et al. (2018) [76]         | RLC            | -                    | 128     | -         | -            | 39.1           | 27.3 | 7.8  | 14.8 | 10.9 |
| Szmuda et al. (2013) [77]             | RCC            | -                    | 206     | -         | -            | 67             | 4.9  | 5.3  | 19   | 3.9  |
| Wong et al. (2012) [79]               | PLC            | -                    | 90      | -         | -            | 78             |      | 22   |      |      |

**Abbreviations:** aVSP, angiographic vasospasm; CONSCIOUS-1, Clazosentan to Overcome Neurological Ischemia and Infarction Occurring after Subarachnoid Hemorrhage; DCI, delayed cerebral ischemia; IQR, interquartile range; n, number; No., number; PLC, prospective longitudinal cohort; pts, patients; RCC, retrospective case control; RCT, randomized controlled trial; RLC, retrospective longitudinal cohort; SD, standard deviation; VSP, vasospasm; WFNS, World Federation of Neurosurgical Societies.

**Table S12.** Clinical burden: The occurrence of DCI in patients with angiographic VSP or its related complications

| Author (date)                     | Study Design   | Subgroup          | No. pts | n   | %    | Odds ratio | 95% CI     | p-value |
|-----------------------------------|----------------|-------------------|---------|-----|------|------------|------------|---------|
| <b>Comparative studies</b>        |                |                   |         |     |      |            |            |         |
| Budohoski et al. (2012) [25]      | PLC            | DCI               | 32      | 28* | 87.5 | -          | -          | 0.0001  |
|                                   |                | No DCI            | 66      | 24* | 36.4 | -          | -          |         |
| Hurth et al. (2020) [30]          | RLC            | aVSP              | 49      | 17  | 34.7 | -          | -          | 0.001   |
|                                   |                | No aVSP           | 87      | 10  | 11.5 | -          | -          |         |
| Vrsajkov et al. (2016) [40]       | PLC            | aVSP              | 29      | 20  | 69.0 | -          | -          | 0.001   |
|                                   |                | No aVSP           | 25      | 5   | 20.0 | -          | -          |         |
| <b>Regression-based studies</b>   |                |                   |         |     |      |            |            |         |
| Aldakkan et al. (2017) [41]       | RCT (post hoc) | Severe aVSP       | 4125    | -   | -    | 9.5        | 2.07–43.50 | 0.004** |
| Al-Mufti et al. (2017) [44]       | PLC            | Ultra-early aVSP† | 1286    | -   | -    | 2.3        | 1.4–3.9    | 0.002** |
|                                   |                |                   |         |     |      | 1.9        | 1.1–3.3    | 0.02‡   |
| Darkwah Oppong et al. (2018) [53] | RCC            | aVSP              | 994     | -   | -    | 3.27       |            | 0.001** |

**Abbreviations:** aVSP, angiographic vasospasm; DCI, delayed cerebral ischemia; n, number; No., number; PLC, prospective longitudinal cohort; pts, patients; RCC, retrospective case control; RCT, randomized controlled trial; RLC, retrospective longitudinal cohort; TCD, transcranial Doppler. \*number of patients with TCD-defined VSP; \*\*univariate analysis; †ultra-early aVSP (defined as angiographic VSP within the first 48 hours of aSAH); ‡multivariate analysis adjusting for age, Hunt-Hess grade, aSAH thickness, aneurysm location, and mean arterial pressure.

**Table S13.** Clinical burden: The occurrence of cerebral infarction in patients with angiographic VSP or its related complications

| Author (date)                   | Study Design | Subgroup                      | No. pts | n  | %    | Odds ratio | 95% CI    | p-value |
|---------------------------------|--------------|-------------------------------|---------|----|------|------------|-----------|---------|
| <b>Comparative studies</b>      |              |                               |         |    |      |            |           |         |
| Jeon et al. (2012) [31]         | RLC          | aVSP                          | 26      | 9  | 34.6 | -          | -         | -       |
|                                 |              | No aVSP                       | 65      | 0  | 0.0  | -          | -         |         |
| Sanelli et al. (2012) [37]      | RLC          | DCI                           | 81      | 46 | 56.8 | -          | -         | <0.0001 |
|                                 |              | No DCI                        | 56      | 0  | 0.0  | -          | -         |         |
| <b>Regression-based studies</b> |              |                               |         |    |      |            |           |         |
| Al-Mufti et al. (2017) [44]     | PLC          | Ultra-early aVSP <sup>†</sup> | 1286    | -  | -    | 2.0        | 1.0–3.9   | 0.04*   |
| Hosmann et al. (2018) [59]      | RLC          | aVSP before intervention      | 80      | -  | -    | -          | -         | 0.02*   |
|                                 |              |                               | 80      | -  | -    | 2.04       | 0.88–4.73 | 0.1**   |
|                                 |              | aVSP after intervention       | 80      | -  | -    | -          | -         | 0.03*   |
|                                 |              |                               | 80      | -  | -    | 1.25       | 0.61–2.59 | 0.54**  |
| Mortimer et al. (2015) [71]     | RLC          | aVSP                          | 57      | -  | -    | -          | -         | 0.0042* |
|                                 |              |                               | 57      | -  | -    | 4.2        | 0.9–18    | 0.0634‡ |

**Abbreviations:** aVSP, angiographic vasospasm; DCI, delayed cerebral ischemia; n, number; No., number; PLC, prospective longitudinal cohort; pts, patients; RCC, retrospective case control; RCT, randomized controlled trial; RLC, retrospective longitudinal cohort. \*univariate analysis; \*\*multivariate analysis, adjusting for Hunt-Hess grade, days of aneurysm treatment, number of interventions; <sup>†</sup>ultra-early aVSP (defined as angiographic VSP within the first 48 hours of aSAH); <sup>‡</sup>multivariate analysis, adjusting for delayed presentation, aneurysm management, age, sex, intraventricular hemorrhage, hydrocephalus, intraparenchymal extension of hemorrhage, use of transluminal balloon angioplasty, and maximal clot thickness.

**Table S14.** Clinical burden: Functional outcome (mRS) in patients with VSP or VSP-related complications compared with patients without VSP or VSP-related complications from comparative studies

| Author (date)                | Study Design | Subgroup                           | Assessment   | mRS score | No. pts | n  | %    | Median mRS | IQR | p-value |
|------------------------------|--------------|------------------------------------|--------------|-----------|---------|----|------|------------|-----|---------|
| Tekle et al. (2014) [38]     | RCC          | New symptomatic TCD-defined VSP    | At discharge | 3–6       | 11      | 9  | 82   | -          | -   | 0.58    |
|                              |              | No new symptomatic TCD-defined VSP |              | 3–6       | 30      | 21 | 70   | -          | -   |         |
| Jeon et al. (2012) [31]      | RLC          | aVSP                               | At discharge | 0–3       | 28      | 19 | 67.9 | -          | -   | 0.303   |
|                              |              | No aVSP                            |              | 0–3       | 65      | 51 | 78.5 | -          | -   |         |
|                              |              | aVSP                               |              | 4–6       | 28      | 9  | 32.1 | -          | -   |         |
|                              |              | No aVSP                            |              | 4–6       | 65      | 14 | 21.5 | -          | -   |         |
| Athiraman et al. (2020) [23] | RLC          | aVSP                               | At discharge | -         | 97      | -  | -    | 2          | 1-3 | 0.76    |
|                              |              | No aVSP                            |              | -         | 60      | -  | -    | 2          | 1-4 |         |
|                              |              | DCI                                | At discharge | -         | 63      | -  | -    | 2          | 1-4 | 0.15    |
|                              |              | No DCI                             |              | -         | 94      | -  | -    | 2          | 1-3 |         |
| Budohoski et al. (2012) [25] | PLC          | DCI                                | At discharge | -         | 32      | -  | -    | 2          | -   | 0.65    |
|                              |              | No DCI                             |              | -         | 66      | -  | -    | 2          | -   |         |
| Uozumi et al. (2017) [39]    | RLC          | aVSP                               | Month 3      | 0–2       | 27      | 5  | 18.5 | -          | -   | <0.01   |
|                              |              | No aVSP                            |              | 0–2       | 70      | 44 | 62.9 | -          | -   |         |
|                              |              | aVSP                               |              | 3–5       | 27      | 18 | 66.7 | -          | -   |         |
|                              |              | No aVSP                            |              | 3–5       | 70      | 23 | 32.9 | -          | -   |         |
|                              |              | aVSP                               |              | 6         | 27      | 4  | 14.8 | -          | -   |         |
|                              |              | No aVSP                            |              | 6         | 70      | 3  | 4.2  | -          | -   |         |

| Author (date)                | Study Design   | Subgroup                              | Assessment | mRS score | No. pts | n   | %     | Median mRS | IQR | p-value   |
|------------------------------|----------------|---------------------------------------|------------|-----------|---------|-----|-------|------------|-----|-----------|
| Ehlert et al. (2016) [27]    | RCC            | Standard therapy with TCD-defined VSP | Month 3    | -         | 25      | -   | -     | 5          | 2-6 | 0.0011*   |
|                              |                | Standard therapy no TCD-defined VSP   |            | -         | 20      | -   | -     | 4          | 2-5 | 0.006*    |
|                              |                | Molsidomine-treated TCD-defined VSP   |            | -         | 29      | -   | -     | 1          | 0-3 | reference |
| Mortimer et al. (2015) [35]  | RCT (post hoc) | Severe aVSP                           | Month 3    | 0-2       | 17      | 15  | 88.2  | -          | -   | 0.7224    |
|                              |                | None/mild aVSP                        |            | 0-2       | 63      | 51  | 81    | -          | -   |           |
| Haegens et al. (2018) [29]   | RLC            | DCI-related infarct                   | Month 3    | 4-6       | 65      | 48  | 74.0  | -          | -   | <0.001    |
|                              |                | No DCI-related infarct                |            | 4-6       | 179     | 64  | 36    | -          | -   |           |
| Ding et al. (2020) [26]      | PLC            | aVSP                                  | Month 6    | 3-6       | 52      | 32  | 61.54 | -          | -   | <0.001    |
|                              |                | No aVSP                               |            | 3-6       | 51      | 12  | 23.53 | -          | -   |           |
| Konczalla et al. (2016) [33] | RLC            | Cerebral VSP lasting >14 days         | Month 6    | 0-2       | 106     | 64  | 60    | -          | -   | <0.01     |
|                              |                | Cerebral VSP lasting ≤14 days         |            | 0-2       | 106     | 52  | 49    | -          | -   |           |
| Abulhasan et al. (2020) [21] | RLC            | DCI + standard therapy                | Month 18   | 0-2       | 87      | 61  | 70    | -          | -   | 0.221**   |
|                              |                | DCI + rescue therapy                  |            | 0-2       | 21      | 14  | 67    | -          | -   | 0.715**   |
|                              |                | No DCI                                |            | 0-2       | 206     | 129 | 63    | -          | -   | reference |

**Abbreviations:** aVSP, angiographic vasospasm; DCI, delayed cerebral ischemia; IQR, interquartile range; mRS, modified Rankin Scale; n, number; No., number; PLC, prospective longitudinal cohort; pts, patients; RCC, retrospective case control; RCT, randomized controlled trial; RLC, retrospective longitudinal cohort; TCD, transcranial Doppler; VSP, vasospasm. \*versus TCD-defined VSP treated with molsidomine; \*\*versus no DCI.

**Table S15.** Clinical burden: Functional outcome (GOS) in patients with VSP or VSP-related complications compared with patients without VSP or VSP-related complications from comparative studies

| Author (date)                | Study Design   | Subgroup             | Assessment   | GOS score           | No. pts | n   | %    | OR (95% CI)  | p-value   |
|------------------------------|----------------|----------------------|--------------|---------------------|---------|-----|------|--------------|-----------|
| Appel et al. (2018) [22]     | PLC            | DCI                  | At discharge | Poor (1–3)          | 14      | -   | -    | 5.4 (1.2–24) | 0.03      |
|                              |                | No DCI               |              | Poor (1–3)          | 20      | -   | -    | -            | Reference |
|                              |                | DCI                  | Month 3      | Poor (1–3)          | 14      | -   | -    | 10 (2–49)    | <0.01     |
|                              |                | No DCI               |              | Poor (1–3)          | 20      | -   | -    | -            | Reference |
| Filipce et al. (2015) [28]   | RLC            | Cerebral VSP         | At discharge | Good                | 38      | 16  | 42.1 | -            | <0.001    |
|                              |                | No cerebral VSP      |              | Good                | 186     | 121 | 65.1 | -            |           |
|                              |                | Cerebral VSP         | At discharge | Moderate disability | 38      | 1   | 2.6  | -            |           |
|                              |                | No cerebral VSP      |              | Moderate disability | 186     | 31  | 16.7 | -            |           |
|                              |                | Cerebral VSP         | At discharge | Severe disability   | 38      | 3   | 7.9  | -            |           |
|                              |                | No cerebral VSP      |              | Severe disability   | 186     | 12  | 6.5  | -            |           |
|                              |                | Cerebral VSP         | At discharge | Vegetative state    | 38      | 7   | 18.4 | -            |           |
|                              |                | No cerebral VSP      |              | Vegetative state    | 186     | 10  | 5.4  | -            |           |
|                              |                | Cerebral VSP         | At discharge | Death               | 38      | 11  | 28.9 | -            |           |
|                              |                | No cerebral VSP      |              | Death               | 186     | 12  | 6.5  | -            |           |
| Mortimer et al. (2015a) [35] | RCT (post hoc) | None/mild aVSP       | At discharge | Good (4–5)          | 63      | 35  | 55.5 | -            | 0.591     |
|                              |                | Severe aVSP          |              | Good (4–5)          | 17      | 8   | 47.1 | -            |           |
|                              |                | None/mild aVSP       | Month 3      | Good (4–5)          | 63      | 52  | 82.5 | -            | 0.4444    |
|                              |                | Severe aVSP          |              | Good (4–5)          | 17      | 16  | 94.1 | -            |           |
|                              | RCC            | Mild TCD-defined VSP | Month 3      | Poor (1–3)          | 55      | 5   | 9.1  | -            | <0.001    |

|                          |          |                          |            |    |      |      |        |   |
|--------------------------|----------|--------------------------|------------|----|------|------|--------|---|
| Sakr et al.<br>2016 [36] |          | Moderate TCD-defined VSP | Poor (1–3) | 24 | 43.6 | -    | <0.001 |   |
|                          |          | Severe TCD-defined VSP   | Poor (1–3) | 26 | 47.3 | -    |        |   |
|                          |          | Mild TCD-defined VSP     | Good (4–5) | 16 | 47.1 | -    |        |   |
|                          |          | Moderate TCD-defined VSP | Good (4–5) | 34 | 15   | 44.1 |        | - |
|                          |          | Severe TCD-defined VSP   | Good (4–5) | 3  | 8.8  | -    |        |   |
|                          |          | Mild TCD-defined VSP     | Poor (1–3) | 5  | 9.6  | -    |        |   |
|                          |          | Moderate TCD-defined VSP | Poor (1–3) | 52 | 23   | 44.2 |        | - |
|                          |          | Severe TCD-defined VSP   | Poor (1–3) | 24 | 46.2 | -    |        |   |
|                          | Month 6  | Mild TCD-defined VSP     | Good (4–5) | 16 | 43.2 | -    |        |   |
|                          |          | Moderate TCD-defined VSP | Good (4–5) | 37 | 16   | 43.2 |        | - |
|                          |          | Severe TCD-defined VSP   | Good (4–5) | 5  | 13.5 | -    |        |   |
|                          |          | Mild TCD-defined VSP     | Poor (1–3) | 5  | 10.2 | -    |        |   |
|                          |          | Moderate TCD-defined VSP | Poor (1–3) | 46 | 21   | 42.9 |        | - |
|                          |          | Severe TCD-defined VSP   | Poor (1–3) | 23 | 46.9 | -    |        |   |
|                          | Month 12 | Mild TCD-defined VSP     | Good (4–5) | 16 | 40.0 | -    |        |   |
|                          |          | Moderate TCD-defined VSP | Good (4–5) | 40 | 18   | 45.0 |        | - |
|                          |          | Severe TCD-defined VSP   | Good (4–5) | 6  | 15.0 | -    |        |   |

**Abbreviations:** aVSP, angiographic vasospasm; CI, confidence interval; DCI, delayed cerebral ischemia; GOS, Glasgow outcome scale; n, number; No., number; OR, odds ratio; PLC, prospective longitudinal cohort; pts, patients; RCC, retrospective case control; RCT, randomized controlled trial; RLC, retrospective longitudinal cohort; VSP, vasospasm.

**Table S16.** Clinical burden: Functional outcome (GOS-E) in patients with VSP or VSP-related complications compared with patients without VSP or VSP-related complications from comparative studies

| Author (date)               | Study Design | Subgroup | Assessment   | GOS-E  | No. pts | n  | %    | Mean | SD   | p-value |
|-----------------------------|--------------|----------|--------------|--------|---------|----|------|------|------|---------|
| Hurth et al. (2020) [30]    | RLC          | aVSP     | At discharge | I-IV   | 49      | 36 | 73.5 | -    | -    | 0.01    |
|                             |              | No aVSP  |              |        | 87      | 44 | 50.6 | -    | -    |         |
|                             |              | aVSP     |              | V-VIII | 49      | 13 | 26.5 | -    | -    |         |
|                             |              | No aVSP  |              |        | 87      | 43 | 49.4 | -    | -    |         |
|                             |              | aVSP     | Month 3-6    | I-IV   | 49      | 12 | 24.5 | -    | -    | 0.72    |
|                             |              | No aVSP  |              |        | 87      | 16 | 18.4 | -    | -    |         |
|                             |              | aVSP     |              | V-VIII | 49      | 30 | 61.2 | -    | -    |         |
|                             |              | No aVSP  |              |        | 87      | 47 | 54.0 | -    | -    |         |
|                             |              | DCI      | At discharge | I-IV   | 27      | 25 | 92.6 | -    | -    | <0.001  |
|                             |              | No DCI   |              |        | 111     | 57 | 51.4 | -    | -    |         |
|                             |              | DCI      |              | V-VIII | 27      | 2  | 7.4  | -    | -    |         |
|                             |              | No DCI   |              |        | 111     | 54 | 48.6 | -    | -    |         |
|                             |              | DCI      | Month 3-6    | I-IV   | 27      | 11 | 55.0 | -    | -    | 0.002   |
|                             |              | No DCI   |              |        | 111     | 18 | 20.9 | -    | -    |         |
|                             |              | DCI      |              | V-VIII | 27      | 9  | 45.0 | -    | -    |         |
|                             |              | No DCI   |              |        | 111     | 68 | 79.1 | -    | -    |         |
| Vrsajkov et al. (2016) [40] | PLC          | aVSP     | Month 6      | -      | 29      | -  | -    | 4.52 | 2.66 | 0.01    |
|                             |              | No aVSP  |              | -      | 25      | -  | -    | 6.16 | 2.11 |         |



**Abbreviations:** aVSP, angiographic vasospasm; DCI, delayed cerebral ischemia; GOS-E, Glasgow outcome scale extended; n, number; No., number; PLC, prospective longitudinal cohort; pts, patients; RLC, retrospective longitudinal cohort; SD, standard deviation; VSP, vasospasm.

**Table S17.** Clinical burden: Cognitive impairment (MoCA and MMSE) in patients with VSP or VSP-related complications

| Author (date)<br>Study ID                   | Study Design      | Predictor                      | Assessment   | Endpoint | No. pts | Odds ratio (95% CIs) | $\beta$ -coefficient | R <sup>2</sup> value | p-value     |
|---------------------------------------------|-------------------|--------------------------------|--------------|----------|---------|----------------------|----------------------|----------------------|-------------|
| <b>MoCA</b>                                 |                   |                                |              |          |         |                      |                      |                      |             |
| Geraghty et al. (2020) [58]                 | RLC               | Cerebral VSP                   | At discharge | MoCA <22 | 105     | 1.27 (0.554–2.908)   | -                    | -                    | 0.572       |
|                                             |                   | DCI                            | At discharge | MoCA <22 | 105     | 3.079 (1.173–8.082)  | -                    | -                    | 0.022       |
| Wong et al. (2012) [79]                     | PLC               | Cerebral infarction due to DCI | Month 3      | MoCA <26 | 90      | -                    | -4.189               | 0.384                | Significant |
| Ali et al. (2018) [42]                      | PLC               | DCI*                           | Year 1       | MoCA <21 | 82      | 3.9 (1.9–7.8)        | -                    | -                    | <0.001      |
| <b>MMSE</b>                                 |                   |                                |              |          |         |                      |                      |                      |             |
| Macdonald et al. (2012) [67]<br>CONSCIOUS-1 | RCT<br>(post hoc) | Severe aVSP                    | Week 12      | MMSE     | 409     | -                    | -                    | -                    | <0.0001**   |
| Wong et al. (2012) [79]                     | PLC               | Cerebral infarction due to DCI | Month 3      | MMSE <27 | 90      | -                    | -3.832               | 0.314                | Significant |

**Abbreviations:** aVSP, angiographic vasospasm; DCI, delayed cerebral ischemia; MMSE, Mini-Mental State Examination; MoCA, Montreal Cognitive Assessment; No., number; PLC, prospective longitudinal cohort; pts, patients; RCT, randomized controlled trial; RLC, retrospective longitudinal cohort; VSP, vasospasm. \*number of days with DCI; \*\*versus pts with no aVSP after adjustment for age and WFNS grade (Kruskal-Wallis one-way comparison across aVSP categories)

**Table S18.** Clinical burden: Mortality in patients with VSP or VSP-related complications compared with patients without VSP or VSP-related complications

| Author (date)                | Study design   | Mortality   | Subgroup                              | No. pts | No. deaths | % died | p-value |
|------------------------------|----------------|-------------|---------------------------------------|---------|------------|--------|---------|
| Jeon et al. (2012) [31]      | RLC            | In hospital | aVSP                                  | 28      | 0          | 0.0    | 1       |
|                              |                |             | No aVSP                               | 65      | 1          | 1.5    |         |
| Konczalla et al. (2016) [33] | RLC            | In hospital | Cerebral VSP lasting >14 days         | 106     | 2          | 1.9    | <0.0001 |
|                              |                |             | Cerebral VSP lasting ≤14 days         | 106     | 24         | 22.6   |         |
| Mortimer et al. (2015) [35]  | RCT (post hoc) | In hospital | Severe aVSP                           | 17      | 0          | 0      | 1       |
|                              |                |             | None/mild aVSP                        | 63      | 2          | 3.2    |         |
| Appel et al. (2018) [22]     | PLC            | In hospital | DCI                                   | 14      | 2          | 14.3   | 0.08    |
|                              |                |             | No DCI                                | 20      | 0          | 0      |         |
| Sanelli et al. (2012) [37]   | RLC            | In hospital | DCI                                   | 81      | 9          | 11.0   | <0.0001 |
|                              |                |             | No DCI                                | 56      | 1          | 2.0    |         |
| Lee et al. (2019) [34]       | RLC            | In hospital | DCI                                   | 97      | nr         | 16.5   | nr      |
|                              |                |             | No DCI                                | 366     | nr         | 13.7   |         |
| Abulhasan et al. (2020) [21] | RLC            | In hospital | DCI + standard therapy                | 89      | 8          | 9      | 0.357   |
|                              |                |             | No DCI                                | 212     | 27         | 13     |         |
| Brown et al. (2013) [24]     | RLC            | In hospital | Delayed infarction                    | 20      | 2          | 10     | 0.134   |
|                              |                |             | No infarction                         | 114     | 3          | 2      |         |
| Budohoski et al. (2012) [25] | PLC            | Day 21      | DCI                                   | 32      | 3          | 9.375  | nr      |
|                              |                |             | No DCI                                | 66      | 3          | 4.545  |         |
| Ehlert et al. (2016) [27]    | RCC            | Month 3     | Standard therapy with TCD-defined VSP | 25      | 9          | 36.0   | nr      |
|                              |                |             | Standard therapy no TCD-defined VSP   | 20      | 3          | 15.0   |         |
|                              |                |             | Molsidomine-treated TCD-defined VSP   | 29      | 1          | 3.4    | 0.0034* |
| Ding et al. (2020) [26]      | PLC            | Month 6     | aVSP                                  | 52      | 26         | 50     | <0.001  |
|                              |                |             | No aVSP                               | 51      | 10         | 19.61  |         |
| Konczalla et al. (2016) [33] | RLC            | Month 6     | Cerebral VSP lasting >14 days         | 106     | 9          | 8      | <0.001  |
|                              |                |             | Cerebral VSP lasting ≤14 days         | 106     | 29         | 27     |         |

**Abbreviations:** aVSP, angiographic vasospasm; DCI, delayed cerebral ischemia; No., number; nr, not reported; PLC, prospective longitudinal cohort; pts, patients; RCC, retrospective case control; RCT,

randomized controlled trial; RLC, retrospective longitudinal cohort; TCD, transcranial Doppler; VSP, vasospasm. \*versus standard therapy with VSP

## References

1. D'Souza S. Aneurysmal Subarachnoid Hemorrhage. *J Neurosurg Anesthesiol* 2015;27:222-40. <https://doi.org/10.1097/ana.0000000000000130>.
2. Macdonald RL, Schweizer TA. Spontaneous subarachnoid haemorrhage. *Lancet* 2017;389:655-66. [https://doi.org/10.1016/s0140-6736\(16\)30668-7](https://doi.org/10.1016/s0140-6736(16)30668-7).
3. Frontera JA, Fernandez A, Schmidt JM, et al. Defining vasospasm after subarachnoid hemorrhage: what is the most clinically relevant definition? *Stroke* 2009;40:1963-8. <https://doi.org/10.1161/strokeaha.108.544700>.
4. Vergouwen MD, Vermeulen M, van Gijn J, et al. Definition of delayed cerebral ischemia after aneurysmal subarachnoid hemorrhage as an outcome event in clinical trials and observational studies: proposal of a multidisciplinary research group. *Stroke* 2010;41:2391-5. <https://doi.org/10.1161/strokeaha.110.589275>.
5. Dorsch NW, King MT. A review of cerebral vasospasm in aneurysmal subarachnoid haemorrhage Part I: Incidence and effects. *J Clin Neurosci* 1994;1:19-26. [https://doi.org/10.1016/0967-5868\(94\)90005-1](https://doi.org/10.1016/0967-5868(94)90005-1).
6. Rabinstein AA, Weigand S, Atkinson JL, Wijdicks EF. Patterns of cerebral infarction in aneurysmal subarachnoid hemorrhage. *Stroke* 2005;36:992-7. <https://doi.org/10.1161/01.STR.0000163090.59350.5a>.
7. Geraghty JR, Testai FD. Delayed Cerebral Ischemia after Subarachnoid Hemorrhage: Beyond Vasospasm and Towards a Multifactorial Pathophysiology. *Current atherosclerosis reports* 2017;19:50. <https://doi.org/10.1007/s11883-017-0690-x>.
8. Østergaard L, Aamand R, Karabegovic S, et al. The role of the microcirculation in delayed cerebral ischemia and chronic degenerative changes after subarachnoid hemorrhage. *J Cereb Blood Flow Metab* 2013;33:1825-37. <https://doi.org/10.1038/jcbfm.2013.173>.
9. Crowley RW, Medel R, Dumont AS, et al. Angiographic vasospasm is strongly correlated with cerebral infarction after subarachnoid hemorrhage. *Stroke* 2011;42:919-23. <https://doi.org/10.1161/STROKEAHA.110.597005>.
10. Weidauer S, Lanfermann H, Raabe A, Zanella F, Seifert V, Beck J. Impairment of cerebral perfusion and infarct patterns attributable to vasospasm after aneurysmal subarachnoid hemorrhage: a prospective MRI and DSA study. *Stroke* 2007;38:1831-6. <https://doi.org/10.1161/strokeaha.106.477976>.
11. Bami J, Chousterman B, Boulouis G, et al. Delayed Cerebral Infarction is Systematically Associated with a Cerebral Vasospasm of Large Intracranial Arteries. *Neurosurgery* 2020;86:E175-e83. <https://doi.org/10.1093/neuros/nyz340>.

12. Thompson JC, Chalet FX, Manalastas EJ, Hawkins N, Sarri G, Talbot DA. Economic and Humanistic Burden of Cerebral Vasospasm and Its Related Complications after Aneurysmal Subarachnoid Hemorrhage: A Systematic Literature Review. *Neurology and therapy* 2022;11:597-620. <https://doi.org/10.1007/s40120-022-00348-6>.
13. Page MJ, McKenzie JE, Bossuyt PM, et al. The PRISMA 2020 statement: An updated guideline for reporting systematic reviews. *J Clin Epidemiol* 2021;134:178-89. <https://doi.org/10.1016/j.jclinepi.2021.03.001>.
14. Lees KR, Bath PM, Schellinger PD, et al. Contemporary outcome measures in acute stroke research: choice of primary outcome measure. *Stroke* 2012;43:1163-70. <https://doi.org/10.1161/STROKEAHA.111.641423>.
15. Jennett B, Bond M. Assessment of outcome after severe brain damage. *Lancet* 1975;1:480-4. [https://doi.org/10.1016/s0140-6736\(75\)92830-5](https://doi.org/10.1016/s0140-6736(75)92830-5).
16. Jennett B, Snoek J, Bond MR, Brooks N. Disability after severe head injury: observations on the use of the Glasgow Outcome Scale. *J Neurol Neurosurg Psychiatry* 1981;44:285-93. <https://doi.org/10.1136/jnnp.44.4.285>.
17. Shah S, Vanclay F, Cooper B. Improving the sensitivity of the Barthel Index for stroke rehabilitation. *J Clin Epidemiol* 1989;42:703-9. [https://doi.org/10.1016/0895-4356\(89\)90065-6](https://doi.org/10.1016/0895-4356(89)90065-6).
18. Lyden PD, Lu M, Levine SR, Brott TG, Broderick J. A Modified National Institutes of Health Stroke Scale for Use in Stroke Clinical Trials. *Stroke* 2001;32:1310-7. <https://doi.org/doi:10.1161/01.STR.32.6.1310>.
19. Nasreddine ZS, Phillips NA, Bédirian V, et al. The Montreal Cognitive Assessment, MoCA: A Brief Screening Tool For Mild Cognitive Impairment. *J Am Geriatr Soc* 2005;53:695-9. <https://doi.org/https://doi.org/10.1111/j.1532-5415.2005.53221.x>.
20. Folstein MF, Folstein SE, McHugh PR. "Mini-mental state". A practical method for grading the cognitive state of patients for the clinician. *J Psychiatr Res* 1975;12:189-98. [https://doi.org/10.1016/0022-3956\(75\)90026-6](https://doi.org/10.1016/0022-3956(75)90026-6).
21. Abulhasan YB, Ortiz Jimenez J, Teitelbaum J, Simoneau G, Angle MR. Milrinone for refractory cerebral vasospasm with delayed cerebral ischemia. *J Neurosurg* 2020;134:971-82. <https://doi.org/10.3171/2020.1.JNS193107>.
22. Appel D, Seeberger M, Schwedhelm E, et al. Asymmetric and Symmetric Dimethylarginines are Markers of Delayed Cerebral Ischemia and Neurological Outcome in Patients with Subarachnoid Hemorrhage. *Neurocrit Care* 2018;29:84-93. <https://doi.org/10.1007/s12028-018-0520-1>.

23. Athiraman U, Aum D, Vellimana AK, et al. Evidence for a conditioning effect of inhalational anesthetics on angiographic vasospasm after aneurysmal subarachnoid hemorrhage. *J Neurosurg* 2020;133:152–8. <https://doi.org/10.3171/2019.3.JNS183512>.
24. Brown RJ, Kumar A, Dhar R, Sampson TR, Diringer MN. The relationship between delayed infarcts and angiographic vasospasm after aneurysmal subarachnoid hemorrhage. *Neurosurgery* 2013;72:702-7; discussion 7-8. <https://doi.org/10.1227/NEU.0b013e318285c3db>.
25. Budohoski KP, Czosnyka M, Smielewski P, et al. Impairment of cerebral autoregulation predicts delayed cerebral ischemia after subarachnoid hemorrhage: a prospective observational study. *Stroke* 2012;43:3230-7. <https://doi.org/10.1161/STROKEAHA.112.669788>.
26. Ding CY, Cai HP, Ge HL, Yu LH, Lin YX, Kang DZ. Is Admission Lipoprotein-Associated Phospholipase A2 a Novel Predictor of Vasospasm and Outcome in Patients With Aneurysmal Subarachnoid Hemorrhage? *Neurosurgery* 2020;86:122-31. <https://doi.org/10.1093/neuros/nyz041>.
27. Ehlert A, Schmidt C, Wolfer J, et al. Molsidomine for the prevention of vasospasm-related delayed ischemic neurological deficits and delayed brain infarction and the improvement of clinical outcome after subarachnoid hemorrhage: a single-center clinical observational study. *J Neurosurg* 2016;124:51-8. <https://doi.org/10.3171/2014.12.JNS13846>.
28. Filipce V, Caparoski A. The Effects of Vasospasm and Re-Bleeding on the Outcome of Patients with Subarachnoid Hemorrhage from Ruptured Intracranial Aneurysm. *Pril (Makedon Akad Nauk Umet Odd Med Nauki)* 2015;36:77-82. <https://doi.org/10.1515/prilozi-2015-0081>.
29. Haegens NM, Gathier CS, Horn J, Coert BA, Verbaan D, van den Bergh WM. Induced Hypertension in Preventing Cerebral Infarction in Delayed Cerebral Ischemia After Subarachnoid Hemorrhage. *Stroke* 2018;49:2630-6. <https://doi.org/10.1161/STROKEAHA.118.022310>.
30. Hurth H, Birkenhauer U, Steiner J, Schlak D, Hennersdorf F, Ebner FH. Delayed Cerebral Ischemia in Patients with Aneurysmal Subarachnoid Hemorrhage - Serum D-dimer and C-reactive Protein as Early Markers. *J Stroke Cerebrovasc Dis* 2020;29:104558. <https://doi.org/10.1016/j.jstrokecerebrovasdis.2019.104558>.
31. Jeon YT, Lee JH, Lee H, et al. The postoperative C-reactive protein level can be a useful prognostic factor for poor outcome and symptomatic vasospasm in patients with aneurysmal subarachnoid hemorrhage. *J Neurosurg Anesthesiol* 2012;24:317-24. <https://doi.org/10.1097/ANA.0b013e31826047a2>.

32. Karamchandani RR, Fletcher JJ, Pandey AS, Rajajee V. Incidence of delayed seizures, delayed cerebral ischemia and poor outcome with the use of levetiracetam versus phenytoin after aneurysmal subarachnoid hemorrhage. *J Clin Neurosci* 2014;21:1507-13.  
<https://doi.org/10.1016/j.jocn.2014.03.009>.
33. Konczalla J, Brawanski N, Bruder M, Senft C, Platz J, Seifert V. Outcome of Patients with Long-Lasting Cerebral Vasospasm After Subarachnoid Hemorrhage: Is Prolonged Treatment for Cerebral Vasospasm Worthwhile? A Matched-Pair Analysis. *World Neurosurg* 2016;88:488-96. <https://doi.org/10.1016/j.wneu.2015.10.033>.
34. Lee H, Perry JJ, English SW, et al. Clinical prediction of delayed cerebral ischemia in aneurysmal subarachnoid hemorrhage. *J Neurosurg* 2019;130:1914–21.  
<https://doi.org/10.3171/2018.1.JNS172715>.
35. Mortimer AM, Steinfert B, Faulder K, et al. The detrimental clinical impact of severe angiographic vasospasm may be diminished by maximal medical therapy and intensive endovascular treatment. *J Neurointerv Surg* 2015;7:881-7.  
<https://doi.org/10.1136/neurintsurg-2014-011403>.
36. Sakr Y, Dunisch P, Santos C, et al. Poor outcome is associated with less negative fluid balance in patients with aneurysmal subarachnoid hemorrhage treated with prophylactic vasopressor-induced hypertension. *Ann Intensive Care* 2016;6:25.  
<https://doi.org/https://doi.org/10.1186/s13613-016-0128-6>.
37. Sanelli PC, Anumula N, Gold R, et al. Outcomes-based assessment of a new reference standard for delayed cerebral ischemia related to vasospasm in aneurysmal subarachnoid hemorrhage. *Acad Radiol* 2012;19:1066-74. <https://doi.org/10.1016/j.acra.2012.04.010>.
38. Tekle WG, Chaudry SA, Hassan AE, et al. High risk of new episode of symptomatic vasospasm in unaffected arteries in subarachnoid hemorrhage patients receiving targeted endovascular treatment for symptomatic focal vasospasm. *Neurocrit Care* 2014;20:399-405.  
<https://doi.org/10.1007/s12028-013-9825-2>.
39. Uozumi Y, Mizobe T, Miyamoto H, et al. Decreased serum sodium levels predict symptomatic vasospasm in patients with subarachnoid hemorrhage. *J Clin Neurosci* 2017;46:118-23.  
<https://doi.org/10.1016/j.jocn.2017.08.037>.
40. Vrsajkov V, Jevđić J, Mihajlovic D, Pajtić V, Lazukić A, Pantić-Vrsajkov J. Ischemic Lesion on Computed Tomography after Subarachnoid Hemorrhage: Good Correlation With Angiographic Vasospasm and Worse Outcome. *Neurosurg Q* 2016;26:225-9.  
<https://doi.org/10.1097/WNQ.000000000000159>.



41. Aldakkan A, Mansouri A, Jaja BN, Alotaibi NM, Macdonald RL, Subarachnoid Hemorrhage International Trialists C. Predictors of Delayed Cerebral Ischemia in Patients with Aneurysmal Subarachnoid Hemorrhage with Asymptomatic Angiographic Vasospasm on Admission. *World Neurosurg* 2017;97:199-204. <https://doi.org/10.1016/j.wneu.2016.09.096>.
42. Ali A, Tanirgan G, Sabanci PA, et al. Relation of gray-white matter ratio with long-term cognitive functions and quality of life in patients with mild to moderate aneurysmal subarachnoid hemorrhage: a prospective observational study. *Acta Neurochir (Wien)* 2018;160:181-9. <https://doi.org/https://doi.org/10.1007/s00701-017-3374-y>.
43. AlMatter M, Aguilar Perez M, Bhogal P, Hellstern V, Ganslandt O, Henkes H. Results of interdisciplinary management of 693 patients with aneurysmal subarachnoid hemorrhage: Clinical outcome and relevant prognostic factors. *Clin Neurol Neurosurg* 2018;167:106-11. <https://doi.org/10.1016/j.clineuro.2018.02.022>.
44. Al-Mufti F, Roh D, Lahiri S, et al. Ultra-early angiographic vasospasm associated with delayed cerebral ischemia and infarction following aneurysmal subarachnoid hemorrhage. *J Neurosurg* 2017;126:1545-51. <https://doi.org/10.3171/2016.2.JNS151939>.
45. Ayling OG, Ibrahim GM, Alotaibi NM, Gooderham PA, Macdonald RL. Dissociation of Early and Delayed Cerebral Infarction After Aneurysmal Subarachnoid Hemorrhage. *Stroke* 2016;47:2945-51. <https://doi.org/10.1161/STROKEAHA.116.014794>.
46. Barges-Coll J, Perez-Neri I, Avendano J, Mendez-Rosito D, Gomez-Amador JL, Rios C. Plasma taurine as a predictor of poor outcome in patients with mild neurological deficits after aneurysmal subarachnoid hemorrhage. *J Neurosurg* 2013;119:1021-7. <https://doi.org/10.3171/2013.4.JNS121558>.
47. Beadell NC, Thompson EM, Delashaw JB, Cetas JS. The deleterious effects of methamphetamine use on initial presentation and clinical outcomes in aneurysmal subarachnoid hemorrhage. *J Neurosurg* 2012;117:781-6. <https://doi.org/10.3171/2012.7.JNS12396>.
48. Brawanski N, Kashefiolasl S, Won SY, et al. Does aneurysm side influence the infarction side and patients outcome after subarachnoid hemorrhage? *PLoS One* 2019;14:e0224013. <https://doi.org/10.1371/journal.pone.0224013>.
49. Brawanski N, Kunze F, Bruder M, et al. Subarachnoid Hemorrhage in Advanced Age: Comparison of Patients Aged 70-79 Years and 80 Years and Older. *World Neurosurg* 2017;106:139-44. <https://doi.org/10.1016/j.wneu.2017.06.056>.
50. Chotai S, Patel PD, Liles C, et al. Impact of Neurovascular Comorbidities and Complications on Outcomes After Procedural Management of Intracranial Aneurysm: Part 2, Ruptured

- Intracranial Aneurysm. *World Neurosurg* 2021;146:e270-e312.  
<https://doi.org/https://doi.org/10.1016/j.wneu.2020.10.091>.
51. Chou CH, Reed SD, Allsbrook JS, Steele JL, Schulman KA, Alexander MJ. Costs of vasospasm in patients with aneurysmal subarachnoid hemorrhage. *Neurosurgery* 2010;67:345-51.  
<https://doi.org/https://doi.org/10.1227/01.NEU.0000371980.08391.71>.
  52. Cinotti R, Putegnat JB, Lakhali K, et al. Evolution of neurological recovery during the first year after subarachnoid haemorrhage in a French university centre. *Anaesth Crit Care Pain Med* 2019;38:251-7. <https://doi.org/10.1016/j.accpm.2018.10.002>.
  53. Darkwah Oppong M, Iannaccone A, Gembruch O, et al. Vasospasm-related complications after subarachnoid hemorrhage: the role of patients' age and sex. *Acta Neurochir (Wien)* 2018;160:1393-400. <https://doi.org/10.1007/s00701-018-3549-1>.
  54. Dinc N, Quick-Weller J, Tritt S, et al. Vasospasm of the basilar artery following spontaneous SAH-clinical observations and implications for vascular research. *Neurosurg Rev* 2019;42:983-9. <https://doi.org/10.1007/s10143-018-1015-4>.
  55. Drazin D, Rosner J, Nuno M, et al. Type of admission is associated with outcome of spontaneous subarachnoid hemorrhage. *Int J Stroke* 2015;10:529-33.  
<https://doi.org/https://doi.org/10.1111/ijvs.12005>.
  56. Dumont AS, Crowley RW, Monteith SJ, et al. Endovascular treatment or neurosurgical clipping of ruptured intracranial aneurysms: effect on angiographic vasospasm, delayed ischemic neurological deficit, cerebral infarction, and clinical outcome. *Stroke* 2010;41:2519-24. <https://doi.org/10.1161/STROKEAHA.110.579383>.
  57. Fontana V, Bond O, Spadaro S, et al. Red Cell Distribution Width After Subarachnoid Hemorrhage. *J Neurosurg Anesthesiol* 2018;30:319-27.  
<https://doi.org/10.1097/ANA.0000000000000459>.
  58. Geraghty JR, Lara-Angulo MN, Spegar M, Reeh J, Testai FD. Severe cognitive impairment in aneurysmal subarachnoid hemorrhage: Predictors and relationship to functional outcome. *J Stroke Cerebrovasc Dis* 2020;29:105027.  
<https://doi.org/10.1016/j.jstrokecerebrovasdis.2020.105027>.
  59. Hosmann A, Rauscher S, Wang WT, et al. Intra-Arterial Papaverine-Hydrochloride and Transluminal Balloon Angioplasty for Neurointerventional Management of Delayed-Onset Post-Aneurysmal Subarachnoid Hemorrhage Vasospasm. *World Neurosurg* 2018;119:e301-e12. <https://doi.org/10.1016/j.wneu.2018.07.138>.
  60. Ibrahim GM, Macdonald RL. The effects of fluid balance and colloid administration on outcomes in patients with aneurysmal subarachnoid hemorrhage: a propensity score-

- matched analysis. *Neurocrit Care* 2013;19:140-9. <https://doi.org/10.1007/s12028-013-9860-z>.
61. Ibrahim GM, Vachhrajani S, Ilodigwe D, et al. Method of aneurysm treatment does not affect clot clearance after aneurysmal subarachnoid hemorrhage. *Neurosurgery* 2012;70:102-9; discussion 9. <https://doi.org/10.1227/NEU.0b013e31822e5a8e>.
  62. Ido K, Kurogi R, Kurogi A, et al. Effect of treatment modality and cerebral vasospasm agent on patient outcomes after aneurysmal subarachnoid hemorrhage in the elderly aged 75 years and older. *PLoS One* 2020;15:e0230953. <https://doi.org/10.1371/journal.pone.0230953>.
  63. Jabbarli R, Reinhard M, Shah M, et al. Early Vasospasm after Aneurysmal Subarachnoid Hemorrhage Predicts the Occurrence and Severity of Symptomatic Vasospasm and Delayed Cerebral Ischemia. *Cerebrovasc Dis* 2016;41:265-72. <https://doi.org/10.1159/000443744>.
  64. Kilbourn KJ, Levy S, Staff I, Kureshi I, McCullough L. Clinical characteristics and outcomes of neurogenic stress cardiomyopathy in aneurysmal subarachnoid hemorrhage. *Clin Neurol Neurosurg* 2013;115:909-14. <https://doi.org/10.1016/j.clineuro.2012.09.006>.
  65. Konczalla J, Brawanski N, Platz J, Senft C, Kashefiolasi S, Seifert V. Aneurysm Location as a Prognostic Outcome Factor After Subarachnoid Hemorrhage From Internal Carotid Artery Aneurysms and Potential Impact for Further Experimental Subarachnoid Hemorrhage Models. *World Neurosurg* 2016;92:273-8. <https://doi.org/10.1016/j.wneu.2016.04.086>.
  66. Lannes M, Teitelbaum J, del Pilar Cortes M, Cardoso M, Angle M. Milrinone and homeostasis to treat cerebral vasospasm associated with subarachnoid hemorrhage: the Montreal Neurological Hospital protocol. *Neurocrit Care* 2012;16:354-62. <https://doi.org/10.1007/s12028-012-9701-5>.
  67. Macdonald RL, Hunsche E, Schuler R, Wlodarczyk J, Mayer SA. Quality of life and healthcare resource use associated with angiographic vasospasm after aneurysmal subarachnoid hemorrhage. *Stroke* 2012;43:1082-8. <https://doi.org/https://doi.org/10.1161/STROKEAHA.111.634071>.
  68. Mahajan C, Chouhan RS, Rath GP, et al. Effect of intraoperative brain protection with propofol on postoperative cognition in patients undergoing temporary clipping during intracranial aneurysm surgery. *Neurol India* 2014;62:262-8. <https://doi.org/https://doi.org/10.4103/0028-3886.136908>.
  69. Matano F, Fujiki Y, Mizunari T, et al. Serum Glucose and Potassium Ratio as Risk Factors for Cerebral Vasospasm after Aneurysmal Subarachnoid Hemorrhage. *J Stroke Cerebrovasc Dis* 2019;28:1951-7. <https://doi.org/10.1016/j.jstrokecerebrovasdis.2019.03.041>.

70. Matsukawa H, Tanikawa R, Kamiyama H, et al. Effects of Clot Removal by Meticulous Irrigation and Continuous Low-Dose Intravenous Nicardipine on Symptomatic Cerebral Vasospasm in Patients with Aneurysmal Subarachnoid Hemorrhage Treated by Clipping. *World Neurosurg* 2015;84:1798-803. <https://doi.org/10.1016/j.wneu.2015.07.069>.
71. Mortimer AM, Steinfert B, Faulder K, et al. Institution of sustained endovascular treatment prior to clinical deterioration in patients with severe angiographic vasospasm: A retrospective observational study of clinico-radiological outcomes. *J Neuroradiol* 2015;42:176-83. <https://doi.org/10.1016/j.neurad.2014.12.002>.
72. Orakdogan M, Emon ST, Somay H, Engin T, Ates O, Berkman MZ. Prognostic Factors in Patients who Underwent Aneurysmal Clipping due to Spontaneous Subarachnoid Hemorrhage. *Turk Neurosurg* 2016;26:840-8. <https://doi.org/10.5137/1019-5149.JTN.13654-14.1>.
73. Ozono I, Ikawa F, Hidaka T, et al. Risk Factor for Poor Outcome in Elderly Patients with Aneurysmal Subarachnoid Hemorrhage Based on Post Hoc Analysis of the Modified WFNS Scale Study. *World Neurosurg* 2020;141:e466-e73. <https://doi.org/10.1016/j.wneu.2020.05.196>.
74. Pegoli M, Mandrekar J, Rabinstein AA, Lanzino G. Predictors of excellent functional outcome in aneurysmal subarachnoid hemorrhage. *J Neurosurg* 2015;122:414-8. <https://doi.org/10.3171/2014.10.JNS14290>.
75. Rass V, Gaasch M, Kofler M, et al. Fluid Intake But Not Fluid Balance Is Associated With Poor Outcome in Nontraumatic Subarachnoid Hemorrhage Patients. *Crit Care Med* 2019;47:e555-e62. <https://doi.org/10.1097/CCM.0000000000003775>.
76. Sokolowski JD, Chen CJ, Ding D, et al. Endovascular treatment for cerebral vasospasm following aneurysmal subarachnoid hemorrhage: predictors of outcome and retreatment. *J Neurointerv Surg* 2018;10:367-74. <https://doi.org/10.1136/neurintsurg-2017-013363>.
77. Szmuda T, Słoniewski P, Waszak PM, Kindrachuk M, Olijewski W. Short- and long-term outcome of surgically treated ruptured internal carotid artery aneurysms. *Acta Neuropsychologica* 2013;11:403-17. <https://doi.org/10.5604/17307503.1090469>.
78. Voellger B, Rupa R, Arndt C, Carl B, Nimsky C. Outcome after Interdisciplinary Treatment for Aneurysmal Subarachnoid Hemorrhage-A Single Center Experience. *Medicina (Kaunas)* 2019;55. <https://doi.org/10.3390/medicina55110724>.
79. Wong GK, Lam S, Ngai K, et al. Evaluation of cognitive impairment by the Montreal cognitive assessment in patients with aneurysmal subarachnoid haemorrhage: prevalence, risk factors

and correlations with 3 month outcomes. *J Neurol Neurosurg Psychiatry* 2012;83:1112-7.  
<https://doi.org/10.1136/jnnp-2012-302217>.

80. Stienen MN, Germans MR, Zindel-Geisseler O, et al. Longitudinal neuropsychological assessment after aneurysmal subarachnoid hemorrhage and its relationship with delayed cerebral ischemia: a prospective Swiss multicenter study. *J Neurosurg* 2022:1-9.  
<https://doi.org/10.3171/2022.2.jns212595>.
